# Supplementary material for: FasR Regulates Fatty Acid Biosynthesis and Is Essential for Virulence of Mycobacterium tuberculosis
Source: Front Microbiol. 2020 Oct 27;11:586285. doi: 10.3389/fmicb.2020.586285 (PMC7652896; doi:10.3389/fmicb.2020.586285)
Supplement: Supplementary file 2 [file Table_1.xlsx]

## Sheet: Table S4
Table S4: Lipidomic profiling of the wild type M. tuberculosis H37Rv (MtbH37Rv), fasR mutant (MtbΔfasR) and the complemented fasR strain (MtbΔfasR-cfasR). The values indicated represent the relative abundance of the MS signals corresponding to the different lipid classes found in the samples. Results are the means of three independent experiments.
CL: Cardiolipin, PE: phosphatidylethanolamine, PG: phosphatidylglycerol, PI: phosphatidylinositol, PIM: phosphatidylinositol mannosides, MA: mycolic acid, SGL4A: tetraacylated sulfoglycolipids, DAG: diacylglycerol, TAG: triacylglycerol, MMDAG: monomeromycolyl diacylglycerols, GroMM: glycerol monomycolate, TMM: trehalose monomycolate, PDIM: phthiocerol dimycocerosates (A and B)
C-' Number of carbons, 'O-' Number of oxigens
SD: Standar deviation
Ionization mode	Adduct	m/z	RT (min)	Lipid class	Lipid feature	MtbH37Rv	MtbH37Rv SD	MtbΔfasR	MtbΔfasR SD	MtbΔfasR-cfasR	MtbΔfasR-cfasR SD
ESI(-) MS	[M-H]-	1351.96	3.38914	CL	CL 64:0	0.0102698	0.00549121	0.014677	0.00109252	0.0187383	0.00513099
ESI(-) MS	[M-H]-	1349.95	3.15057	CL	CL 64:1	0.0491292	0.0127596	0.0622206	0.0136902	0.0681557	0.00192438
ESI(-) MS	[M-H]-	1347.93	2.859	CL	CL 64:2	0.0365818	0.00989349	0.0443567	0.017452	0.0407684	0.00467671
ESI(-) MS	[M-H]-	1345.91	2.56386	CL	CL 64:3	0.00733905	0.00189374	0.00708836	0.00237515	0.00523534	0.000553777
ESI(-) MS	[M-H]-	1365.98	3.51143	CL	CL 65:0	0.0198639	0.00279819	0.0177686	0.00279042	0.0252668	0.00653121
ESI(-) MS	[M-H]-	1363.96	3.24471	CL	CL 65:1	0.135387	0.0322251	0.0799664	0.00625281	0.158973	0.0301347
ESI(-) MS	[M-H]-	1361.95	3.04371	CL	CL 65:2	0.0734605	0.0376069	0.0493862	0.0230855	0.0558481	0.00483635
ESI(-) MS	[M-H]-	1359.93	2.75857	CL	CL 65:3	0.0107219	0.00258981	0.00921841	0.00521954	0.00867994	0.00139264
ESI(-) MS	[M-H]-	1379.99	3.55529	CL	CL 66:0	0.159349	0.0178374	0.0857619	0.0762863	0.235933	0.048712
ESI(-) MS	[M-H]-	1377.98	3.49886	CL	CL 66:1	0.382598	0.0748122	0.436812	0.0556122	0.647194	0.0637247
ESI(-) MS	[M-H]-	1375.96	3.215	CL	CL 66:2	1.28815	0.173056	1.2899	0.0481151	1.59304	0.0912666
ESI(-) MS	[M-H]-	1373.95	2.953	CL	CL 66:3	0.412109	0.108119	0.421612	0.181329	0.329065	0.0320199
ESI(-) MS	[M-H]-	1371.93	2.677	CL	CL 66:4	0.0199369	0.00132694	0.0302162	0.0108814	0.0144917	0.00216852
ESI(-) MS	[M-H]-	1394.01	3.874	CL	CL 67:0	0.131567	0.0209815	0.0919062	0.0116962	0.151554	0.040417
ESI(-) MS	[M-H]-	1391.99	3.61186	CL	CL 67:1	0.926321	0.203163	0.50195	0.0497429	0.779987	0.042763
ESI(-) MS	[M-H]-	1389.98	3.3835	CL	CL 67:2	1.39781	0.244033	0.87249	0.0409058	1.46429	0.156167
ESI(-) MS	[M-H]-	1387.96	3.12857	CL	CL 67:3	0.41738	0.15294	0.31196	0.12659	0.344976	0.00294681
ESI(-) MS	[M-H]-	1385.94	3.18567	CL	CL 67:4	0.0208206	0.00849725	0.014047	0.00431994	0.0172951	0.0100371
ESI(-) MS	[M-H]-	1408.02	3.98529	CL	CL 68:0	0.178566	0.0147727	0.105169	0.0314075	0.109441	0.00260429
ESI(-) MS	[M-H]-	1406.01	3.844	CL	CL 68:1	0.920127	0.206576	0.69239	0.155905	1.2847	0.0696438
ESI(-) MS	[M-H]-	1401.98	3.28467	CL	CL 68:3	7.2705	0.792595	6.47704	0.694052	7.57912	0.592745
ESI(-) MS	[M-H]-	1399.96	3.04686	CL	CL 68:4	0.672391	0.180442	0.888658	0.266938	0.392647	0.053648
ESI(-) MS	[M-H]-	1422.04	4.211	CL	CL 69:0	0.26168	0.0464531	0.0762719	0.0247389	0.1206	0.00180756
ESI(-) MS	[M-H]-	1420.03	3.95083	CL	CL 69:1	7.57791	0.973854	3.19083	0.445963	6.53327	0.83059
ESI(-) MS	[M-H]-	1418.01	3.67983	CL	CL 69:2	4.85797	0.707922	2.62856	0.137487	4.31074	0.118462
ESI(-) MS	[M-H]-	1415.99	3.47133	CL	CL 69:3	1.52812	0.192201	1.06488	0.0382803	1.29841	0.036396
ESI(-) MS	[M-H]-	1413.97	3.23529	CL	CL 69:4	0.192761	0.093861	0.135006	0.0135766	0.127331	0.0295667
ESI(-) MS	[M-H]-	1436.06	4.33657	CL	CL 70:0	2.68441	0.411882	0.779643	0.594634	0.883966	0.176682
ESI(-) MS	[M-H]-	1434.04	4.07629	CL	CL 70:1	1.44888	0.688365	0.42846	0.315779	0.861134	0.298398
ESI(-) MS	[M-H]-	1432.03	3.9105	CL	CL 70:2	1.82297	0.218767	1.44099	0.195476	1.86911	0.0560281
ESI(-) MS	[M-H]-	1430.01	3.6505	CL	CL 70:3	1.89852	0.323932	1.41631	0.0533538	1.75347	0.182353
ESI(-) MS	[M-H]-	1427.99	3.39817	CL	CL 70:4	0.682132	0.0788882	0.664003	0.0124362	0.554039	0.00981952
ESI(-) MS	[M-H]-	1450.07	4.40117	CL	CL 71:0	0.396864	0.0933674	0.190845	0.164343	0.153573	0.000102551
ESI(-) MS	[M-H]-	1448.06	4.31771	CL	CL 71:1	0.840124	0.175631	0.463845	0.323069	0.393044	0.053099
ESI(-) MS	[M-H]-	1446.04	4.04617	CL	CL 71:2	1.45459	0.0637787	0.64497	0.263437	0.905173	0.00219453
ESI(-) MS	[M-H]-	1444.02	3.81167	CL	CL 71:3	0.498638	0.0735574	0.240616	0.105977	0.376007	0.00443312
ESI(-) MS	[M-H]-	1442.01	3.93983	CL	CL 71:4	0.722817	0.469676	0.47348	0.0781284	0.928652	0.132772
ESI(-) MS	[M-H]-	1464.09	4.672	CL	CL 72:0	0.0974271	0.082115	0.0294659	0.021487	0.0136152	4.28275e-05
ESI(-) MS	[M-H]-	1462.07	4.401	CL	CL 72:1	0.318884	0.16709	0.0703616	0.0556797	0.0638888	0.0159873
ESI(-) MS	[M-H]-	1460.05	4.30829	CL	CL 72:2	0.266047	0.0491244	0.137556	0.0784326	0.144116	0.0119395
ESI(-) MS	[M-H]-	1458.04	4.05129	CL	CL 72:3	0.293435	0.0576842	0.195708	0.0493521	0.26869	0.000924212
ESI(-) MS	[M-H]-	1456.02	3.78114	CL	CL 72:4	0.175737	0.058264	0.036851	0.0359816	0.174885	0.008117
ESI(-) MS	[M-H]-	1478.1	4.732	CL	CL 73:0	0.0289131	0.00709575	0.00952955	0.0110601	0.00983397	0.00164628
ESI(-) MS	[M-H]-	1476.09	4.67871	CL	CL 73:1	0.040237	0.0233976	0.0160168	0.0129987	0.0080531	0.00369054
ESI(-) MS	[M-H]-	1474.07	4.40557	CL	CL 73:2	0.0873135	0.0173568	0.0406963	0.0250725	0.0329802	0.00138828
ESI(-) MS	[M-H]-	1472.05	4.23914	CL	CL 73:3	0.0417006	0.0134367	0.0177455	0.0141325	0.0346394	0.0195383
ESI(-) MS	[M-H]-	1470.04	4.32086	CL	CL 73:4	0.0646961	0.0295194	0.0349986	0.0044443	0.0684564	0.0122085
ESI(-) MS	[M-H]-	662.475	1.033	PE	PE 30:0	0.00595458	0.00434092	0.0121742	0.00443931	0.0352538	0.0290765
ESI(-) MS	[M-H]-	676.494	1.11143	PE	PE 31:0	0.0267338	0.0136054	0.039965	0.0162558	0.129051	0.115056
ESI(-) MS	[M-H]-	674.476	0.989667	PE	PE 31:1	0.0176138	0.00971604	0.0139527	0.00617251	0.0434106	0.0453818
ESI(-) MS	[M-H]-	672.459	0.938714	PE	PE 31:2	0.0781125	0.0124337	0.00633525	0.00114861	0.0311841	0.0421988
ESI(-) MS	[M-H]-	690.507	1.2055	PE	PE 32:0	0.176255	0.153434	0.446411	0.26923	0.599022	0.344701
ESI(-) MS	[M-H]-	704.524	1.32983	PE	PE 33:0	0.105992	0.0814505	0.127264	0.0593713	0.235938	0.131355
ESI(-) MS	[M-H]-	702.507	1.16167	PE	PE 33:1	0.00656409	0.00680001	0.0157712	0.0112537	0.0112504	0.0102888
ESI(-) MS	[M-H]-	718.537	1.469	PE	PE 34:0	0.364226	0.373646	1.08459	0.715299	1.11194	0.20955
ESI(-) MS	[M-H]-	716.521	1.2895	PE	PE 34:1	0.0449163	0.031104	0.144605	0.0917317	0.121473	0.0265205
ESI(-) MS	[M-H]-	714.508	1.13233	PE	PE 34:2	0.00321248	0.00237995	0.0150388	0.00568026	0.00709801	2.53158e-05
ESI(-) MS	[M-H]-	732.553	1.53867	PE	PE 35:0	0.652436	0.731579	0.536565	0.332833	1.51366	0.546098
ESI(-) MS	[M-H]-	730.536	1.37017	PE	PE 35:1	0.0205526	0.0289224	0.0319313	0.0146247	0.0555643	0.0272607
ESI(-) MS	[M-H]-	746.567	1.75083	PE	PE 36:0	0.123171	0.152963	0.207698	0.11511	0.245482	0.0224181
ESI(-) MS	[M-H]-	746.568	1.72929	PE	PE 36:0	0.123445	0.15264	0.206055	0.117433	0.23854	0.032236
ESI(-) MS	[M-H]-	744.553	1.53133	PE	PE 36:1	0.0192823	0.0258686	0.0492851	0.0242707	0.0638269	0.014803
ESI(-) MS	[M-H]-	760.585	1.87167	PE	PE 37:0	0.0677671	0.0692928	0.0325557	0.00212924	0.0821398	0.0359543
ESI(-) MS	[M-H]-	774.6	2.14267	PE	PE 38:0	0.00352952	0.00198228	0.00532762	0.00361196	0.00641393	0.00628577
ESI(-) MS	[M-H]-	788.619	2.3365	PE	PE 39:0	0.0309961	0.00515713	0.0285447	0.0147018	0.0545119	0.0108974
ESI(-) MS	[M-H]-	830.662	3.12	PE	PE 42:0	0.00391663	0.00384114	0.0224458	0.0130903	0.0420904	0.00129975
ESI(-) MS	[M-H]-	844.682	3.22233	PE	PE 43:0	0.0119372	0.00467693	0.0117977	0.00289432	0.00947889	0.00129325
ESI(-) MS	[M-H]-	858.694	3.57017	PE	PE 44:0	0.00138643	0.000792787	0.0123899	0.0090393	0.0200517	0.00205432
ESI(-) MS	[M-H]-	721.501	0.923667	PG	PG 32:0	0.0286677	0.00712557	0.0287528	0.00927634	0.0383463	0.0209826
ESI(-) MS	[M-H]-	719.485	0.8505	PG	PG 32:1	0.0174388	0.00140653	0.0512937	0.0363628	0.0322783	0.0192156
ESI(-) MS	[M-H]-	717.47	0.788333	PG	PG 32:2	0.00360764	0.00318485	0.0151515	0.0104611	0.00357567	0.00322853
ESI(-) MS	[M-H]-	735.517	0.960333	PG	PG 33:0	0.0202039	0.00253319	0.00659196	0.00262953	0.0196337	0.0110687
ESI(-) MS	[M-H]-	733.502	0.890667	PG	PG 33:1	0.0164478	0.00380072	0.0204624	0.0104611	0.020616	0.013782
ESI(-) MS	[M-H]-	731.488	0.843333	PG	PG 33:2	0.00814142	0.00342039	0.00913043	0.00100014	0.0152602	0.00828824
ESI(-) MS	[M-H]-	749.533	1.03367	PG	PG 34:0	0.0480588	0.0131823	0.0453569	0.00397126	0.0553711	0.00186088
ESI(-) MS	[M-H]-	747.517	0.951286	PG	PG 34:1	0.340497	0.0456754	0.390047	0.0298727	0.449217	0.175146
ESI(-) MS	[M-H]-	745.5	0.872714	PG	PG 34:2	0.0684733	0.0120099	0.200955	0.0977718	0.0860395	0.0642833
ESI(-) MS	[M-H]-	763.547	1.0775	PG	PG 35:0	0.154273	0.0147264	0.116024	0.0238558	0.14466	0.0338288
ESI(-) MS	[M-H]-	761.532	0.995286	PG	PG 35:1	0.0605368	0.00639902	0.0721717	0.00994457	0.0610034	0.0146202
ESI(-) MS	[M-H]-	759.518	0.938333	PG	PG 35:2	0.020204	0.009552	0.0188299	0.00587924	0.0243432	0.0204004
ESI(-) MS	[M-H]-	777.563	1.18343	PG	PG 36:0	0.0205619	0.00472931	0.0132066	0.000952628	0.0225118	0.0177425
ESI(-) MS	[M-H]-	775.548	1.0775	PG	PG 36:1	0.0276136	0.00758868	0.0352719	0.00364244	0.0315795	0.00489253
ESI(-) MS	[M-H]-	773.531	0.973286	PG	PG 36:2	0.034476	0.00270077	0.047564	0.00214272	0.0279044	0.00503025
ESI(-) MS	[M-H]-	795.505	0.844571	PI	PI 31:0	0.0162275	0.00242626	0.0172223	0.0100064	0.0287999	0.0252752
ESI(-) MS	[M-H]-	793.489	0.7445	PI	PI 31:1	0.00257791	0.00257723	0.0100875	0.00191632	0.00270395	0.000940685
ESI(-) MS	[M-H]-	809.517	0.894333	PI	PI 32:0	0.225173	0.0170964	0.201054	0.105524	0.243554	0.133218
ESI(-) MS	[M-H]-	807.503	0.832	PI	PI 32:1	0.0257838	0.00197049	0.0401474	0.0259468	0.0345599	0.0255017
ESI(-) MS	[M-H]-	805.486	0.813833	PI	PI 32:2	0.00184698	0.00050848	0.00488611	0.00287616	0.000814941	0.000589134
ESI(-) MS	[M-H]-	823.534	0.926143	PI	PI 33:0	0.708672	0.0824663	0.389476	0.0717881	0.833796	0.425032
ESI(-) MS	[M-H]-	821.519	0.868667	PI	PI 33:1	0.0191993	0.00308704	0.0356689	0.0190268	0.0248267	0.0168402
ESI(-) MS	[M-H]-	819.503	0.822571	PI	PI 33:2	0.00213278	0.000443636	0.00558526	0.00362808	0.00242854	0.00105332
ESI(-) MS	[M-H]-	837.548	0.995286	PI	PI 34:0	0.682888	0.0620713	0.444513	0.0290791	0.765265	0.210465
ESI(-) MS	[M-H]-	835.533	0.919857	PI	PI 34:1	0.216522	0.041008	0.332987	0.105865	0.205198	0.0684892
ESI(-) MS	[M-H]-	833.518	0.850857	PI	PI 34:2	0.031984	0.0128749	0.198199	0.133038	0.0388991	0.0219344
ESI(-) MS	[M-H]-	851.565	1.04557	PI	PI 35:0	15.5767	1.56203	6.68719	0.0671972	15.6361	3.34031
ESI(-) MS	[M-H]-	849.549	0.963857	PI	PI 35:1	0.25666	0.0423456	0.199366	0.00232288	0.239609	0.0666968
ESI(-) MS	[M-H]-	847.533	0.897857	PI	PI 35:2	0.0134384	0.00408803	0.0331871	0.0122565	0.0121565	0.00603787
ESI(-) MS	[M-H]-	865.582	1.12071	PI	PI 36:0	0.671856	0.115865	0.247964	0.0181425	0.622972	0.195791
ESI(-) MS	[M-H]-	863.567	1.01729	PI	PI 36:1	0.149275	0.0282016	0.167385	0.00494623	0.13662	0.00196447
ESI(-) MS	[M-H]-	861.549	0.953	PI	PI 36:2	0.00963614	0.00645442	0.0198124	0.00370299	0.00543741	0.00285874
ESI(-) MS	[M-H]-	879.595	1.20543	PI	PI 37:0	0.670291	0.211443	0.284352	0.0757531	0.514008	0.193312
ESI(-) MS	[M-H]-	877.583	1.11757	PI	PI 37:1	0.0813029	0.00403739	0.0822833	0.019361	0.0454703	0.000996317
ESI(-) MS	[M-H]-	875.567	0.982714	PI	PI 37:2	0.00517778	0.00172065	0.0155111	6.68238e-05	0.00279889	0.00192903
ESI(-) MS	[M-H]-	893.615	1.26814	PI	PI 38:0	0.0154101	0.0127472	0.0095728	0.00312447	0.0128888	0.0108591
ESI(-) MS	[M-H]-	891.601	1.18343	PI	PI 38:1	0.0243185	0.00998369	0.0366959	0.0172098	0.0139142	0.00440196
ESI(-) MS	[M-H]-	889.581	0.951286	PI	PI 38:2	0.00519015	0.00316265	0.00311037	0.000775464	0.00162984	0.000879488
ESI(-) MS	[M-H]-	905.613	1.30871	PI	PI 39:1	0.0909091	0.024902	0.167883	0.0771005	0.0381084	0.00402471
ESI(-) MS	[M-H]-	903.597	1.174	PI	PI 39:2	0.0461756	0.00945325	0.0679538	0.0150177	0.0289605	0.00348403
ESI(-) MS	[M-H]-	1013.62	0.998429	PIM	PIM1 35:0	0.0209844	0.00698997	0.0344678	0.00235434	0.0225821	0.00701832
ESI(-) MS	[M-H]-	1251.85	2.21583	PIM	PIM1Ac1 51:0	0.028934	0.00850464	0.00864469	0.00234126	0.018262	0.010439
ESI(-) MS	[M-H]-	1279.88	2.66233	PIM	PIM1Ac1 53:0	0.00502833	0.00140103	0.00200477	0.00066681	0.00313367	0.00118799
ESI(-) MS	[M-H]-	1490.08	4.29483	PIM	PIM1Ac2 67:0	0.00386827	0.0024441	0.0038548	0.00271004	0.000823324	4.81407e-05
ESI(-) MS	[M-H]-	1518.11	4.51083	PIM	PIM1Ac2 69:0	0.00345019	0.0015458	0.0032899	0.00270976	0.000427364	5.29862e-05
ESI(-) MS	[M-H]-	1532.12	4.7085	PIM	PIM1Ac2 70:0	0.0120884	0.000898678	0.00683663	0.00767917	0.000946081	0.00034619
ESI(-) MS	[M-H]-	1133.62	0.769833	PIM	PIM2 32:0	0.0269496	0.00575523	0.0159431	0.00237923	0.0224883	0.01564
ESI(-) MS	[M-H]-	1175.67	0.910429	PIM	PIM2 35:0	0.159783	0.0723473	0.164118	0.0136451	0.12654	0.0600259
ESI(-) MS	[M-H]-	1413.9	2.2745	PIM	PIM2Ac1 51:0	3.89202	0.82846	1.57522	0.326522	5.14169	2.27565
ESI(-) MS	[M-H]-	1441.93	2.73933	PIM	PIM2Ac1 53:0	1.33765	0.374647	0.541608	0.0823273	1.44855	0.484818
ESI(-) MS	[M-H]-	1652.13	4.33133	PIM	PIM2Ac2 67:0	1.03523	0.543332	1.69323	0.00826041	1.14829	0.130487
ESI(-) MS	[M-H]-	1680.16	4.66467	PIM	PIM2Ac2 69:0	0.954212	0.199561	1.32731	0.216566	0.687367	0.155341
ESI(-) MS	[M-H]-	1694.17	4.73767	PIM	PIM2Ac2 70:0	2.69192	0.335103	2.2722	0.32248	2.21165	0.433248
ESI(-) MS	[M-H]-	1337.72	0.860286	PIM	PIM3 35:0	0.00653255	0.00253539	0.000700044	0.000297317	0.00471309	0.000805362
ESI(-) MS	[M-H]-	1575.95	2.183	PIM	PIM3Ac1 51:0	0.0664372	0.0196582	0.0113993	0.000942787	0.0626789	0.0108297
ESI(-) MS	[M-H]-	1603.98	2.644	PIM	PIM3Ac1 53:0	0.0186883	0.00598308	0.0030971	0.000111619	0.0139722	0.00127218
ESI(-) MS	[M-H]-	1842.21	4.5805	PIM	PIM3Ac2 69:0	0.00774709	0.00324841	0.0126007	0.00102655	0.00664938	0.00686434
ESI(-) MS	[M-H]-	1856.23	4.661	PIM	PIM3Ac2 70:0	0.0793519	0.0171522	0.0189762	0.0022722	0.0378621	0.0153007
ESI(-) MS	[M-H]-	2062.11	1.9155	PIM	PIM6Ac1 51:0	0.0484233	0.039798	0.0159199	0.00491898	0.0953232	0.0391929
ESI(-) MS	[M-H]-	2090.14	2.338	PIM	PIM6Ac1 53:0	0.00131683	0.00100465	0.00343942	0.00120514	0.00946062	0.00509677
ESI(-) MS	[M-H]-	2300.33	4.00217	PIM	PIM6Ac2 67:0	0.00880572	0.0090218	0.0154815	0.00744602	0.0125191	0.00607915
ESI(-) MS	[M-H]-	2328.37	4.32417	PIM	PIM6Ac2 69:0	0.00919876	0.00928975	0.0141175	0.00129438	0.0104857	0.013133
ESI(-) MS	[M-H]-	2342.38	4.40467	PIM	PIM6Ac2 70:0	0.019979	0.0220386	0.0089439	0.00605152	0.0229901	0.0256435
ESI(-) MS	[M-H]-	1024.04	7.26333	MA alpha	MA alpha C-70	0.00120175	0.000809207	0.00649237	0.00675226	0.00134399	0.000861114
ESI(-) MS	[M-H]-	1038.05	7.30367	MA alpha	MA alpha C-71	0.00239434	0.00151516	0.00457226	0.00241044	0.00152148	0.00021237
ESI(-) MS	[M-H]-	1052.07	7.48671	MA alpha	MA alpha C-72	0.0202786	0.00552648	0.145205	0.0443287	0.0273284	0.010607
ESI(-) MS	[M-H]-	1066.09	7.562	MA alpha	MA alpha C-73	0.0196167	0.00462297	0.0588048	0.00882686	0.0176639	0.00408859
ESI(-) MS	[M-H]-	1080.1	7.72514	MA alpha	MA alpha C-74	0.299241	0.0614979	1.40377	0.135259	0.295651	0.121257
ESI(-) MS	[M-H]-	1094.12	7.819	MA alpha	MA alpha C-75	0.0696259	0.00942159	0.242835	0.0340212	0.0583557	0.0262758
ESI(-) MS	[M-H]-	1108.13	7.95414	MA alpha	MA alpha C-76	1.821	0.312172	5.5975	0.0112262	1.61688	0.526087
ESI(-) MS	[M-H]-	1122.15	8.064	MA alpha	MA alpha C-77	0.139219	0.0151345	0.421194	0.0226231	0.118877	0.0347386
ESI(-) MS	[M-H]-	1136.16	8.16743	MA alpha	MA alpha C-78	3.24835	0.460809	7.19491	0.649623	2.71674	0.69742
ESI(-) MS	[M-H]-	1150.18	8.28357	MA alpha	MA alpha C-79	0.11403	0.00743493	0.32267	0.00519917	0.111148	0.0250256
ESI(-) MS	[M-H]-	1164.2	8.38386	MA alpha	MA alpha C-80	1.77377	0.223774	4.62561	0.18964	1.52175	0.385117
ESI(-) MS	[M-H]-	1178.21	8.49057	MA alpha	MA alpha C-81	0.0543462	0.00441468	0.146933	0.0198263	0.0648332	0.0154579
ESI(-) MS	[M-H]-	1192.23	8.59429	MA alpha	MA alpha C-82	0.744286	0.076469	2.29188	0.01967	0.697299	0.18383
ESI(-) MS	[M-H]-	1206.24	8.69143	MA alpha	MA alpha C-83	0.0315398	0.00446133	0.0697804	0.0028624	0.043226	0.008955
ESI(-) MS	[M-H]-	1220.26	8.79186	MA alpha	MA alpha C-84	0.384623	0.0198971	1.15053	0.0592895	0.447377	0.183152
ESI(-) MS	[M-H]-	1234.27	8.87029	MA alpha	MA alpha C-85	0.0150739	0.00288346	0.0177532	0.000630009	0.0187795	0.00867041
ESI(-) MS	[M-H]-	1248.29	8.98314	MA alpha	MA alpha C-86	0.0616771	0.0046429	0.164786	0.0146369	0.0891863	0.0392122
ESI(-) MS	[M-H]-	1262.3	9.00829	MA alpha	MA alpha C-87	0.00210013	0.00100617	0.00484434	0.00186483	0.0018465	0.000972107
ESI(-) MS	[M-H]-	1276.32	9.15586	MA alpha	MA alpha C-88	0.00570352	0.000962606	0.0127363	0.000685166	0.0110777	0.00473735
ESI(-) MS	[M-H]-	1110.11	6.62057	MA keto	MA keto C-75	0.0108334	0.0015669	0.0166985	0.00691143	0.00457794	0.00172701
ESI(-) MS	[M-H]-	1124.13	6.83086	MA keto	MA keto C-76	0.00529959	0.00168722	0.0233398	0.00943452	0.00308638	0.00301055
ESI(-) MS	[M-H]-	1138.14	6.89686	MA keto	MA keto C-77	0.0243984	0.00180003	0.039386	0.0146278	0.0125708	0.00261898
ESI(-) MS	[M-H]-	1152.16	7.09443	MA keto	MA keto C-78	0.025884	0.000338852	0.0930734	0.0350978	0.0188801	0.00629417
ESI(-) MS	[M-H]-	1166.17	7.15086	MA keto	MA keto C-79	0.0215635	0.00403648	0.0410564	0.0123998	0.0196193	0.00596735
ESI(-) MS	[M-H]-	1180.19	7.32657	MA keto	MA keto C-80	0.0920041	0.0155716	0.28774	0.0591701	0.0715466	0.0183307
ESI(-) MS	[M-H]-	1194.2	7.40514	MA keto	MA keto C-81	0.0213787	0.0044525	0.0328217	0.0127247	0.0172988	0.00458296
ESI(-) MS	[M-H]-	1208.22	7.55571	MA keto	MA keto C-82	0.243684	0.0410676	0.739835	0.116826	0.225532	0.0879768
ESI(-) MS	[M-H]-	1222.24	7.57457	MA keto	MA keto C-83	0.039152	0.00371206	0.113775	0.0227832	0.0334658	0.00827752
ESI(-) MS	[M-H]-	1236.25	7.79071	MA keto	MA keto C-84	0.465941	0.0780203	1.09128	0.062512	0.436911	0.210316
ESI(-) MS	[M-H]-	1250.27	7.78757	MA keto	MA keto C-85	0.144038	0.0123248	0.412921	0.0518023	0.140795	0.0533584
ESI(-) MS	[M-H]-	1264.28	8.00443	MA keto	MA keto C-86	0.353121	0.0481632	0.515457	0.0458385	0.35737	0.126452
ESI(-) MS	[M-H]-	1278.3	7.99186	MA keto	MA keto C-87	0.271705	0.0413984	0.388379	0.0229487	0.286082	0.090121
ESI(-) MS	[M-H]-	1292.31	8.21771	MA keto	MA keto C-88	0.0462479	0.0122403	0.0401379	0.00573205	0.0679038	0.0164184
ESI(-) MS	[M-H]-	1306.33	8.23014	MA keto	MA keto C-89	0.0399264	0.0022061	0.00481665	0.00211351	0.0575708	0.018726
ESI(-) MS	[M-H]-	1320.35	8.72286	MA keto	MA keto C-90	0.00280532	0.000910836	0.00763385	0.00213898	0.00636242	0.00623439
ESI(-) MS	[M-H]-	1084.1	6.59543	MA methoxy	MA methoxy C-73	0.0056642	0.00143547	0.0159699	0.0107396	0.00289885	0.00127849
ESI(-) MS	[M-H]-	1112.13	6.87486	MA methoxy	MA methoxy C-75	0.00445571	0.00109452	0.0143859	0.00745965	0.00300755	0.00123133
ESI(-) MS	[M-H]-	1140.16	7.52443	MA methoxy	MA methoxy C-77	0.0166897	0.00641193	0.0886787	0.0240806	0.020276	0.00695138
ESI(-) MS	[M-H]-	1154.17	7.57771	MA methoxy	MA methoxy C-78	0.0189845	0.00319522	0.0293744	0.00588931	0.0145468	0.007183
ESI(-) MS	[M-H]-	1168.19	7.75029	MA methoxy	MA methoxy C-79	0.12761	0.0293562	0.609864	0.0460504	0.157463	0.0877755
ESI(-) MS	[M-H]-	1182.21	7.81271	MA methoxy	MA methoxy C-80	0.0610377	0.011245	0.125884	0.00989367	0.0607824	0.0333789
ESI(-) MS	[M-H]-	1196.22	7.973	MA methoxy	MA methoxy C-81	0.741113	0.178719	2.11033	0.135327	0.884871	0.447361
ESI(-) MS	[M-H]-	1210.24	8.03257	MA methoxy	MA methoxy C-82	0.125547	0.0264317	0.247286	0.00283292	0.152638	0.0870648
ESI(-) MS	[M-H]-	1224.25	8.18629	MA methoxy	MA methoxy C-83	2.19761	0.405964	4.37122	0.179688	2.68138	1.38529
ESI(-) MS	[M-H]-	1238.27	8.26786	MA methoxy	MA methoxy C-84	0.187273	0.0254061	0.38274	0.0189469	0.272092	0.169039
ESI(-) MS	[M-H]-	1252.28	8.39643	MA methoxy	MA methoxy C-85	3.59147	0.694328	6.09397	1.039	4.37234	2.46687
ESI(-) MS	[M-H]-	1266.3	8.37443	MA methoxy	MA methoxy C-86	0.255569	0.0361346	0.665911	0.0899116	0.478021	0.360356
ESI(-) MS	[M-H]-	1280.32	8.59114	MA methoxy	MA methoxy C-87	2.61899	0.511078	4.69653	0.171443	3.35346	2.09762
ESI(-) MS	[M-H]-	1294.33	8.57229	MA methoxy	MA methoxy C-88	0.430986	0.0312717	0.890076	0.0323106	0.852669	0.720348
ESI(-) MS	[M-H]-	1308.35	8.78871	MA methoxy	MA methoxy C-89	0.651909	0.130512	1.10763	0.0258142	1.21559	1.00963
ESI(-) MS	[M-H]-	1322.36	8.76043	MA methoxy	MA methoxy C-90	0.107523	0.00848051	0.162255	0.00992689	0.299659	0.30406
ESI(-) MS	[M-H]-	1336.38	8.96743	MA methoxy	MA methoxy C-91	0.117472	0.0213978	0.13919	0.0309081	0.318357	0.315444
ESI(-) MS	[M-H]-	1896.53	5.64833	SGLA4	SGLA4 C-111 O-20	0.00210129	0.00271421	0	0	0	0
ESI(-) MS	[M-H]-	1910.55	5.64725	SGLA4	SGLA4 C-112 O-20	0.00254608	0.00268131	0	0	0.000187056	0.000264537
ESI(-) MS	[M-H]-	1952.59	5.87	SGLA4	SGLA4 C-115 O-20	0.00404074	0.00245344	0	0	0.00126807	0.000434712
ESI(-) MS	[M-H]-	1980.62	6.0535	SGLA4	SGLA4 C-117 O-20	0.000723072	0.000571748	0	0	0.000156004	0.000220623
ESI(-) MS	[M-H]-	2008.65	6.0915	SGLA4	SGLA4 C-119 O-20	0.00103623	0.00103478	0	0	0.000418746	1.87267e-05
ESI(-) MS	[M-H]-	2036.68	6.2555	SGLA4	SGLA4 C-121 O-20	0.000750999	0.00100225	0	0	0	0
ESI(-) MS	[M-H]-	2078.7	6.9145	SGLA4	SGLA4 C-124 O-20	0.00212699	0.00337569	0	0	0	0
ESI(-) MS	[M-H]-	2106.73	7.149	SGLA4	SGLA4 C-126 O-20	0.00345299	0.00411906	0	0	0	0
ESI(-) MS	[M-H]-	1980.62	6.0535	SGLA4	SGLA4 C-117 O-20	0.000723072	0.000571748	0	0	0.000156004	0.000220623
ESI(-) MS	[M-H]-	2008.65	6.0915	SGLA4	SGLA4 C-119 O-20	0.00103623	0.00103478	0	0	0.000418746	1.87267e-05
ESI(-) MS	[M-H]-	2036.68	6.2555	SGLA4	SGLA4 C-121 O-20	0.000750999	0.00100225	0	0	0	0
ESI(-) MS	[M-H]-	2078.7	6.9145	SGLA4	SGLA4 C-124 O-20	0.00212699	0.00337569	0	0	0	0
ESI(-) MS	[M-H]-	2106.73	7.149	SGLA4	SGLA4 C-126 O-20	0.00345299	0.00411906	0	0	0	0
ESI(-) MS	[M-H]-	2120.74	7.164	SGLA4	SGLA4 C-127 O-20	0.00382805	0.00549432	0	0	0	0
ESI(-) MS	[M-H]-	2134.76	7.22233	SGLA4	SGLA4 C-128 O-20	0.00306647	0.00438969	0	0	0	0
ESI(-) MS	[M-H]-	2148.77	7.164	SGLA4	SGLA4 C-129 O-20	0.00514362	0.0068899	0	0	0	0
ESI(-) MS	[M-H]-	2162.79	7.122	SGLA4	SGLA4 C-130 O-20	0.00522555	0.00817899	0.000120375	0.000170235	0.000236137	0.000333948
ESI(-) MS	[M-H]-	2176.81	7.206	SGLA4	SGLA4 C-131 O-20	0.00458365	0.00667934	0.000125154	0.000176995	0	0
ESI(-) MS	[M-H]-	2190.82	7.25183	SGLA4	SGLA4 C-132 O-20	0.0102714	0.00861668	0.000465878	0.000658851	0.000610711	0.000329939
ESI(-) MS	[M-H]-	2204.84	7.2624	SGLA4	SGLA4 C-133 O-20	0.00997279	0.01033	0.000137287	0.000194154	0.000582988	0.000824469
ESI(-) MS	[M-H]-	2218.85	7.40925	SGLA4	SGLA4 C-134 O-20	0.00766379	0.00956989	0.000428599	0.00060613	0	0
ESI(-) MS	[M-H]-	2232.87	7.43329	SGLA4	SGLA4 C-135 O-20	0.0103344	0.00852413	0.000614794	0.000351894	0.00110984	0.000799651
ESI(-) MS	[M-H]-	2246.88	7.44967	SGLA4	SGLA4 C-136 O-20	0.0109741	0.010347	0.000279096	0.000394701	0.000416797	6.14931e-05
ESI(-) MS	[M-H]-	2260.9	7.53575	SGLA4	SGLA4 C-137 O-20	0.00802822	0.00765206	0.000151368	0.000214066	0	0
ESI(-) MS	[M-H]-	2274.91	7.52283	SGLA4	SGLA4 C-138 O-20	0.0117789	0.00934398	0.00103142	0.00145865	0.000618305	0.000101548
ESI(-) MS	[M-H]-	2288.93	7.47729	SGLA4	SGLA4 C-139 O-20	0.014532	0.0119693	0.000895473	0.000713125	0.00178305	0.000266652
ESI(-) MS	[M-H]-	2302.95	7.5738	SGLA4	SGLA4 C-140 O-20	0.00995145	0.0084505	0.000174247	0.000246423	0.000190083	0.000268817
ESI(-) MS	[M-H]-	2316.96	7.61214	SGLA4	SGLA4 C-141 O-20	0.020435	0.0159689	0.00127259	0.0011817	0.00345763	0.000684598
ESI(-) MS	[M-H]-	2330.98	7.64733	SGLA4	SGLA4 C-142 O-20	0.0189395	0.0153487	0.00106169	0.00150146	0.00366755	6.16071e-05
ESI(-) MS	[M-H]-	2344.99	7.75014	SGLA4	SGLA4 C-143 O-20	0.0164656	0.0139592	0.000814422	0.000541198	0.00238755	0.000237227
ESI(-) MS	[M-H]-	2359.01	7.76886	SGLA4	SGLA4 C-144 O-20	0.020064	0.0158848	0.00136723	0.000743699	0.00383528	7.89648e-06
ESI(-) MS	[M-H]-	2373.02	7.78757	SGLA4	SGLA4 C-145 O-20	0.0179414	0.0146011	0.00076904	0.000468253	0.00394307	0.000121366
ESI(-) MS	[M-H]-	2387.04	7.91083	SGLA4	SGLA4 C-146 O-20	0.0121205	0.0116187	0.000135842	0.00019211	0.00107071	0.000835626
ESI(-) MS	[M-H]-	2401.05	7.92183	SGLA4	SGLA4 C-147 O-20	0.014385	0.011155	0.000122364	0.000173049	0.00267174	0.000184179
ESI(-) MS	[M-H]-	2415.07	7.93283	SGLA4	SGLA4 C-148 O-20	0.0182674	0.0156736	0.000130709	0.00018485	0.00476152	0.000594938
ESI(-) MS	[M-H]-	2429.09	8.0135	SGLA4	SGLA4 C-149 O-20	0.0108997	0.00959305	0.000132498	0.00018738	0.00104844	0.000734863
ESI(-) MS	[M-H]-	2443.1	8.06833	SGLA4	SGLA4 C-150 O-20	0.01697	0.0139869	0.000247601	0.000350161	0.0035	0.000396478
ESI(-) MS	[M-H]-	2457.12	8.0748	SGLA4	SGLA4 C-151 O-20	0.0140967	0.0119085	0	0	0.00287202	5.6988e-05
ESI(-) MS	[M-H]-	2471.13	8.20017	SGLA4	SGLA4 C-152 O-20	0.0106275	0.00859807	0.000134452	0.000190143	0.00107525	0.000550573
ESI(-) MS	[M-H]-	2485.15	8.21467	SGLA4	SGLA4 C-153 O-20	0.0114411	0.00981735	0.000122504	0.000173247	0.00219191	7.03776e-05
ESI(-) MS	[M-H]-	2499.16	8.2024	SGLA4	SGLA4 C-154 O-20	0.00997711	0.00866981	0	0	0.00196711	0.000395855
ESI(-) MS	[M-H]-	2513.18	8.32833	SGLA4	SGLA4 C-155 O-20	0.00774657	0.00688486	0	0	0	0
ESI(-) MS	[M-H]-	2527.2	8.3342	SGLA4	SGLA4 C-156 O-20	0.00756484	0.00773619	0	0	0.00107913	0.000599709
ESI(-) MS	[M-H]-	2541.21	8.3254	SGLA4	SGLA4 C-157 O-20	0.00693683	0.00764006	0	0	0.000896455	0.00080764
ESI(-) MS	[M-H]-	2555.23	8.441	SGLA4	SGLA4 C-158 O-20	0.00528349	0.00552709	0	0	0	0
ESI(-) MS	[M-H]-	2569.24	8.45775	SGLA4	SGLA4 C-159 O-20	0.00505995	0.00669392	0	0	0.000536164	0.00075825
ESI(-) MS	[M-H]-	2583.26	8.463	SGLA4	SGLA4 C-160 O-20	0.00410742	0.00633992	0	0	0	0
ESI(-) MS	[M-H]-	2597.27	8.573	SGLA4	SGLA4 C-161 O-20	0.00362278	0.00456037	0	0	0	0
ESI(-) MS	[M-H]-	2611.29	8.56775	SGLA4	SGLA4 C-162 O-20	0.00298724	0.00341752	0	0	0.00064063	0.000393213
ESI(-) MS	[M-H]-	1924.56	5.6588	SGLA4	SGLA4 C-112 O-21	0.00384995	0.00366647	0	0	0.00135288	0.000131386
ESI(-) MS	[M-H]-	2010.6	5.685	SGLA4	SGLA4 C-118 O-21	0.00049336	0.000854525	0	0	0	0
ESI(-) MS	[M-H]-	2038.63	5.839	SGLA4	SGLA4 C-120 O-21	0.000382673	0.000662809	0	0	0	0
ESI(-) MS	[M-H]-	2122.72	6.2015	SGLA4	SGLA4 C-126 O-21	0.00302385	0.00359883	0.000551077	0.00077934	0	0
ESI(-) MS	[M-H]-	2136.74	6.13	SGLA4	SGLA4 C-127 O-21	0.00251578	0.00326012	0.000132118	0.000186844	0	0
ESI(-) MS	[M-H]-	2164.77	6.3272	SGLA4	SGLA4 C-129 O-21	0.00273501	0.00406408	0.000475837	0.00014517	0	0
ESI(-) MS	[M-H]-	2178.79	6.2298	SGLA4	SGLA4 C-130 O-21	0.00354816	0.00513961	0.000589378	0.000833507	0.000192746	0.000272584
ESI(-) MS	[M-H]-	2206.82	6.4104	SGLA4	SGLA4 C-132 O-21	0.0044686	0.0038065	0.000678837	0.000449007	0	0
ESI(-) MS	[M-H]-	2220.83	6.448	SGLA4	SGLA4 C-133 O-21	0.00896821	0.00688266	0.00239881	0.00279505	0.00201459	0.000133867
ESI(-) MS	[M-H]-	2234.85	6.5745	SGLA4	SGLA4 C-134 O-21	0.0043052	0.004816	0.000988383	0.00139778	0	0
ESI(-) MS	[M-H]-	2248.87	6.89683	SGLA4	SGLA4 C-135 O-21	0.0103872	0.00691039	0.00319361	0.00180934	0.000735158	0.000436758
ESI(-) MS	[M-H]-	2262.88	6.47943	SGLA4	SGLA4 C-136 O-21	0.00727834	0.00857294	0.00152752	0.00163445	0.00112614	0.00101751
ESI(-) MS	[M-H]-	2276.89	6.7175	SGLA4	SGLA4 C-137 O-21	0.00523237	0.00736063	0.000191797	0.000271242	0	0
ESI(-) MS	[M-H]-	2290.91	6.63929	SGLA4	SGLA4 C-138 O-21	0.00652046	0.00634867	0.00107263	0.000968285	0.00036524	8.49325e-05
ESI(-) MS	[M-H]-	2304.92	6.608	SGLA4	SGLA4 C-139 O-21	0.0135368	0.0130961	0.00229173	0.00102278	0.00324468	0.00121395
ESI(-) MS	[M-H]-	2332.96	6.77443	SGLA4	SGLA4 C-141 O-21	0.0172079	0.0154213	0.00346821	0.00123903	0.00343822	0.000605687
ESI(-) MS	[M-H]-	2346.97	6.75243	SGLA4	SGLA4 C-142 O-21	0.0197155	0.0156733	0.00330713	0.000676433	0.00486059	0.000277871
ESI(-) MS	[M-H]-	2360.99	6.91257	SGLA4	SGLA4 C-143 O-21	0.0154272	0.0122782	0.00191019	0.001372	0.000958825	0.000215206
ESI(-) MS	[M-H]-	2389.02	6.86857	SGLA4	SGLA4 C-145 O-21	0.0199789	0.0168422	0.00218259	0.00235661	0.00426847	0.000866163
ESI(-) MS	[M-H]-	2403.03	7.0298	SGLA4	SGLA4 C-146 O-21	0.0120651	0.01038	0.000642027	0.000907964	0.000204315	0.000288945
ESI(-) MS	[M-H]-	2417.05	7.01286	SGLA4	SGLA4 C-147 O-21	0.0158443	0.01145	0.00201486	0.000484327	0.00188207	0.00126797
ESI(-) MS	[M-H]-	2431.07	6.969	SGLA4	SGLA4 C-148 O-21	0.0439687	0.0394813	0.0046118	0.000586696	0.0119916	0.00172566
ESI(-) MS	[M-H]-	2445.08	7.08186	SGLA4	SGLA4 C-149 O-21	0.0190383	0.014438	0.0020557	0.00149958	0.00157395	0.00165671
ESI(-) MS	[M-H]-	2459.1	7.13843	SGLA4	SGLA4 C-150 O-21	0.0503994	0.036022	0.00492699	0.000933409	0.0110555	0.000904615
ESI(-) MS	[M-H]-	2473.11	7.13214	SGLA4	SGLA4 C-151 O-21	0.0382164	0.0293021	0.0028332	0.00228052	0.00908907	0.00229782
ESI(-) MS	[M-H]-	2487.13	7.27314	SGLA4	SGLA4 C-152 O-21	0.0311337	0.0232966	0.00263377	0.00113115	0.00478069	0.00156717
ESI(-) MS	[M-H]-	2501.14	7.27	SGLA4	SGLA4 C-153 O-21	0.031257	0.0240536	0.00194482	0.000670811	0.00648979	0.000654491
ESI(-) MS	[M-H]-	2515.16	7.26371	SGLA4	SGLA4 C-154 O-21	0.0422468	0.0333847	0.00136159	0.000649437	0.0104719	0.00244622
ESI(-) MS	[M-H]-	2529.17	7.39467	SGLA4	SGLA4 C-155 O-21	0.0222923	0.0152979	0.000151903	0.000214823	0.00372241	0.000821306
ESI(-) MS	[M-H]-	2543.19	7.41129	SGLA4	SGLA4 C-156 O-21	0.0331083	0.0243481	0.00068424	0.000439971	0.00672173	0.00154467
ESI(-) MS	[M-H]-	2557.21	7.4095	SGLA4	SGLA4 C-157 O-21	0.0288554	0.0205169	0.000272106	0.000384816	0.00717676	0.00188967
ESI(-) MS	[M-H]-	2571.22	7.5346	SGLA4	SGLA4 C-158 O-21	0.0226007	0.0160308	0	0	0.00443367	0.00153455
ESI(-) MS	[M-H]-	2585.24	7.534	SGLA4	SGLA4 C-159 O-21	0.0226982	0.0166201	0.000140881	0.000199236	0.00597408	0.00150518
ESI(-) MS	[M-H]-	2599.25	7.5302	SGLA4	SGLA4 C-160 O-21	0.0290657	0.0212065	0	0	0.00858204	0.00228062
ESI(-) MS	[M-H]-	2613.27	7.6314	SGLA4	SGLA4 C-161 O-21	0.0165768	0.0122084	0	0	0.00364551	0.000629644
ESI(-) MS	[M-H]-	2625.27	7.5635	SGLA4	SGLA4 C-162 O-21	0.00209012	0.00287249	0	0	0.0001796	0.000253993
ESI(-) MS	[M-H]-	2641.3	7.6532	SGLA4	SGLA4 C-163 O-21	0.0190011	0.0147743	0	0	0.00633048	0.00133288
ESI(-) MS	[M-H]-	2655.31	7.7672	SGLA4	SGLA4 C-164 O-21	0.0121052	0.00963277	0	0	0.00251492	0.00077497
ESI(-) MS	[M-H]-	2683.35	7.7804	SGLA4	SGLA4 C-166 O-21	0.0126472	0.0108388	0	0	0.00405873	0.000817191
ESI(-) MS	[M-H]-	2697.36	7.85425	SGLA4	SGLA4 C-167 O-21	0.00735929	0.00566768	0	0	0.0011883	0.00168051
ESI(-) MS	[M-H]-	2711.38	7.8946	SGLA4	SGLA4 C-168 O-21	0.0065646	0.00557724	0	0	0.00185058	0.000350749
ESI(-) MS	[M-H]-	2725.39	7.8946	SGLA4	SGLA4 C-169 O-21	0.00722386	0.00711205	0	0	0.00298163	0.00049935
ESI(-) MS	[M-H]-	2739.41	7.9956	SGLA4	SGLA4 C-170 O-21	0.00373427	0.00462058	0	0	0.000562003	0.000190142
ESI(-) MS	[M-H]-	2753.43	8.0266	SGLA4	SGLA4 C-171 O-21	0.00390221	0.00414152	0	0	0.000824852	0.000612051
ESI(-) MS	[M-H]-	2767.44	8.03	SGLA4	SGLA4 C-172 O-21	0.00475228	0.00484189	0	0	0.00120549	0.00170482
ESI(-) MS	[M-H]-	2781.46	8.0905	SGLA4	SGLA4 C-173 O-21	0.00253407	0.00366099	0	0	0	0
ESI(-) MS	[M-H]-	2795.47	8.13767	SGLA4	SGLA4 C-174 O-21	0.00237863	0.00260357	0	0	0	0
ESI(-) MS	[M-H]-	2809.49	8.145	SGLA4	SGLA4 C-175 O-21	0.00260504	0.00302195	0	0	0	0
ESI(+) MS	[M+NH4]+	558.507	1.39643	DAG	DAG 30:0	0.014668	0.00407033	0.0100988	0.00763359	0.0116722	0.00125826
ESI(+) MS	[M+NH4]+	556.492	1.187	DAG	DAG 30:1	0.00496413	0.00149883	0.00172317	0.00243692	0.00166744	0.00203649
ESI(+) MS	[M+NH4]+	572.523	1.52514	DAG	DAG 31:0	0.0148488	0.00516699	0.00175023	0.00150417	0.00717676	0.00122687
ESI(+) MS	[M+NH4]+	586.539	1.68214	DAG	DAG 32:0	0.332072	0.0869865	0.119682	0.0900229	0.220898	0.00480087
ESI(+) MS	[M+NH4]+	584.523	1.45762	DAG	DAG 32:1	0.0604886	0.0195132	0.0244261	0.0172542	0.0382878	0.00886598
ESI(+) MS	[M+NH4]+	582.508	1.28986	DAG	DAG 32:2	0.00664358	0.00152923	0.00398377	0.00361163	0.00254881	0.00134023
ESI(+) MS	[M+NH4]+	600.554	1.81175	DAG	DAG 33:0	0.20508	0.0799206	0.0396787	0.0278372	0.0997347	0.017547
ESI(+) MS	[M+NH4]+	598.539	1.57857	DAG	DAG 33:1	0.0343791	0.0116138	0.00850933	0.00551856	0.0191356	0.00449811
ESI(+) MS	[M+NH4]+	614.571	2.05625	DAG	DAG 34:0	1.07335	0.224768	0.341869	0.273967	0.614464	0.0699557
ESI(+) MS	[M+NH4]+	612.556	1.75137	DAG	DAG 34:1	0.584782	0.154204	0.189425	0.147373	0.368155	0.0651968
ESI(+) MS	[M+NH4]+	610.54	1.522	DAG	DAG 34:2	0.0771668	0.0275718	0.0389535	0.0266002	0.0276071	0.0101238
ESI(+) MS	[M+NH4]+	628.586	2.16588	DAG	DAG 35:0	1.67925	0.392423	0.274424	0.22773	0.871598	0.0897645
ESI(+) MS	[M+NH4]+	626.57	1.86662	DAG	DAG 35:1	0.200518	0.0619249	0.0442402	0.0327257	0.0896477	0.00604451
ESI(+) MS	[M+NH4]+	624.556	1.64975	DAG	DAG 35:2	0.015274	0.00480616	0.00571326	0.00498039	0.00434375	0.0013781
ESI(+) MS	[M+NH4]+	642.602	2.53387	DAG	DAG 36:0	0.529963	0.0884059	0.158355	0.12786	0.266104	0.0968081
ESI(+) MS	[M+NH4]+	640.586	2.14125	DAG	DAG 36:1	0.216085	0.0435874	0.0704771	0.05528	0.114678	0.0193902
ESI(+) MS	[M+NH4]+	638.573	1.831	DAG	DAG 36:2	0.075506	0.0227069	0.0302241	0.0239186	0.0314994	0.0118022
ESI(+) MS	[M+NH4]+	656.617	2.641	DAG	DAG 37:0	0.231791	0.048197	0.0413824	0.0327307	0.079615	0.0141308
ESI(+) MS	[M+NH4]+	654.601	2.26475	DAG	DAG 37:1	0.103456	0.0246555	0.0184019	0.0167076	0.0370605	0.00175183
ESI(+) MS	[M+NH4]+	670.632	2.99512	DAG	DAG 38:0	0.0628707	0.00993855	0.0280052	0.0207183	0.035518	0.0134754
ESI(+) MS	[M+NH4]+	668.616	2.608	DAG	DAG 38:1	0.0261043	0.00624446	0.0104188	0.00680978	0.00774742	0.00724517
ESI(+) MS	[M+NH4]+	698.664	3.4865	DAG	DAG 40:0	0.0272406	0.00493815	0.0248676	0.0100103	0.0259802	0.00144687
ESI(+) MS	[M+NH4]+	712.68	3.74725	DAG	DAG 41:0	0.00744578	0.00193762	0.00587368	0.00448361	0.00654588	0.000282177
ESI(+) MS	[M+NH4]+	710.663	3.43712	DAG	DAG 41:1	0.00796081	0.00183601	0.00384109	0.00347259	0.00387232	0.00236019
ESI(+) MS	[M+NH4]+	726.695	3.9945	DAG	DAG 42:0	0.107382	0.0176557	0.0946378	0.0362006	0.107842	0.00317471
ESI(+) MS	[M+NH4]+	724.679	3.62113	DAG	DAG 42:1	0.029501	0.00796728	0.0191574	0.00469851	0.0231458	0.00147473
ESI(+) MS	[M+NH4]+	740.708	4.2115	DAG	DAG 43:0	0.0113848	0.00128266	0.0107845	0.0114122	0.0106558	0.000791801
ESI(+) MS	[M+NH4]+	738.695	3.88738	DAG	DAG 43:1	0.0172146	0.00621343	0.01292	0.00396832	0.0144324	0.00191129
ESI(+) MS	[M+NH4]+	754.726	4.45025	DAG	DAG 44:0	0.0943415	0.0246187	0.0883621	0.0232851	0.0805272	0.0158741
ESI(+) MS	[M+NH4]+	752.71	4.07413	DAG	DAG 44:1	0.0560107	0.0153818	0.0314813	0.0104172	0.0386054	0.00357152
ESI(+) MS	[M+NH4]+	750.696	3.73913	DAG	DAG 44:2	0.0200361	0.00754446	0.0172036	0.00129793	0.0120447	0.00157921
ESI(+) MS	[M+NH4]+	766.724	4.37613	DAG	DAG 45:1	0.0194084	0.00601613	0.012147	0.00678125	0.0157666	0.00542395
ESI(+) MS	[M+NH4]+	764.71	4.022	DAG	DAG 45:2	0.0120002	0.00390677	0.00405882	0.00321755	0.0104658	0.00377326
ESI(+) MS	[M+NH4]+	782.755	4.92513	DAG	DAG 46:0	0.007257	0.0032202	0.0329747	0.00960231	0.00871848	0.000591304
ESI(+) MS	[M+NH4]+	780.74	4.52987	DAG	DAG 46:1	0.00808614	0.00125235	0.0142455	0.0030398	0.00797352	0.00153783
ESI(+) MS	[M+NH4]+	810.788	5.3438	DAG	DAG 48:0	0.00105933	0.000144854	0.0191569	0.00172859	0.0023303	0.0010913
ESI(+) MS	[M+NH4]+	808.772	4.94437	DAG	DAG 48:1	0.00101766	0.000498198	0.00712982	0.000167283	0.000661156	0.000232028
ESI(+) MS	[M+NH4]+	806.758	4.595	DAG	DAG 48:2	0.000431704	0.000189993	0.00212803	0.00107824	0.000400826	0.000135174
ESI(+) MS	[M+NH4]+	726.659	3.37971	TAG	TAG 41:0	0.0231939	0.00280169	0.0178041	0.00298417	0.0273137	0.00520945
ESI(+) MS	[M+NH4]+	740.675	3.69043	TAG	TAG 42:0	0.0671821	0.00950354	0.115048	0.0307348	0.117407	0.0290715
ESI(+) MS	[M+NH4]+	754.691	3.84714	TAG	TAG 43:0	0.0936212	0.013117	0.0915811	0.0208687	0.111657	0.0229134
ESI(+) MS	[M+NH4]+	768.707	4.15157	TAG	TAG 44:0	0.253375	0.0300215	0.222268	0.00721439	0.418548	0.116956
ESI(+) MS	[M+NH4]+	766.691	3.78757	TAG	TAG 44:1	0.187597	0.0240659	0.145936	0.0207354	0.281008	0.0983762
ESI(+) MS	[M+NH4]+	764.676	3.41414	TAG	TAG 44:2	0.0374944	0.00520625	0.0477458	0.0122711	0.0410477	0.0100107
ESI(+) MS	[M+NH4]+	762.659	3.12857	TAG	TAG 44:3	0.00222854	0.00117903	0.0110847	0.00119807	0.0022396	0.00246051
ESI(+) MS	[M+NH4]+	782.722	4.31486	TAG	TAG 45:0	0.29799	0.0362614	0.164621	0.000925838	0.344971	0.0347205
ESI(+) MS	[M+NH4]+	780.707	3.98843	TAG	TAG 45:1	0.196563	0.0256204	0.0564802	0.00943266	0.215206	0.0602019
ESI(+) MS	[M+NH4]+	778.691	3.64957	TAG	TAG 45:2	0.0357978	0.0051388	0.0102171	0.00387375	0.0312422	0.00642281
ESI(+) MS	[M+NH4]+	776.675	3.339	TAG	TAG 45:3	0.00220664	0.00088351	0.000420452	0.000130772	0.000568947	0.000235014
ESI(+) MS	[M+NH4]+	796.738	4.61914	TAG	TAG 46:0	0.584152	0.0449716	0.599043	0.0578331	0.979801	0.161248
ESI(+) MS	[M+NH4]+	794.723	4.24571	TAG	TAG 46:1	0.651193	0.0856495	0.217738	0.0497601	0.884311	0.233113
ESI(+) MS	[M+NH4]+	792.707	3.88486	TAG	TAG 46:2	0.158514	0.029801	0.0575406	0.00702974	0.182455	0.0627912
ESI(+) MS	[M+NH4]+	790.69	3.55543	TAG	TAG 46:3	0.0145012	0.00382708	0.011087	0.0008983	0.0117933	0.00302582
ESI(+) MS	[M+NH4]+	810.754	4.75414	TAG	TAG 47:0	0.511045	0.0274777	0.234515	0.0422068	0.627228	0.0612095
ESI(+) MS	[M+NH4]+	808.739	4.41529	TAG	TAG 47:1	0.603532	0.083984	0.123241	0.0492804	0.629588	0.125729
ESI(+) MS	[M+NH4]+	806.722	4.09829	TAG	TAG 47:2	0.145755	0.0242948	0.0312655	0.0115067	0.114692	0.0312856
ESI(+) MS	[M+NH4]+	804.705	3.80329	TAG	TAG 47:3	0.012347	0.00345436	0.00382649	0.000457472	0.00907477	0.000550623
ESI(+) MS	[M+NH4]+	824.77	5.05843	TAG	TAG 48:0	1.34927	0.0768363	1.56519	0.144728	2.02669	0.0868886
ESI(+) MS	[M+NH4]+	822.754	4.70386	TAG	TAG 48:1	1.64036	0.106367	0.762024	0.158893	2.06013	0.203616
ESI(+) MS	[M+NH4]+	820.738	4.34	TAG	TAG 48:2	0.584672	0.0953093	0.220924	0.0421571	0.611873	0.141238
ESI(+) MS	[M+NH4]+	818.722	4.02	TAG	TAG 48:3	0.065878	0.0154397	0.0341244	0.00218405	0.0517568	0.0128461
ESI(+) MS	[M+NH4]+	838.786	5.18386	TAG	TAG 49:0	1.08714	0.0372355	0.691384	0.120564	1.18949	0.0311093
ESI(+) MS	[M+NH4]+	836.77	4.91714	TAG	TAG 49:1	0.925907	0.0786171	0.264364	0.101839	1.14595	0.268965
ESI(+) MS	[M+NH4]+	834.754	4.55643	TAG	TAG 49:2	0.296132	0.0554219	0.0755356	0.0304109	0.254732	0.0581849
ESI(+) MS	[M+NH4]+	832.738	4.24257	TAG	TAG 49:3	0.0358082	0.00776957	0.011324	0.00381947	0.0227779	0.00741913
ESI(+) MS	[M+NH4]+	852.802	5.48514	TAG	TAG 50:0	1.81489	0.0366695	2.44319	0.0178598	2.39828	0.049993
ESI(+) MS	[M+NH4]+	850.786	5.14	TAG	TAG 50:1	2.83263	0.0727087	1.76868	0.21568	3.28822	0.0953392
ESI(+) MS	[M+NH4]+	848.77	4.77614	TAG	TAG 50:2	1.12283	0.0410994	0.604478	0.112605	1.23431	0.235985
ESI(+) MS	[M+NH4]+	846.754	4.44029	TAG	TAG 50:3	0.180669	0.0342946	0.135827	0.00881793	0.144441	0.0265025
ESI(+) MS	[M+NH4]+	866.817	5.60129	TAG	TAG 51:0	1.93629	0.051504	1.55453	0.113377	1.99445	0.108556
ESI(+) MS	[M+NH4]+	864.802	5.29071	TAG	TAG 51:1	2.19588	0.0104257	0.882735	0.267419	2.14952	0.117906
ESI(+) MS	[M+NH4]+	862.785	4.98314	TAG	TAG 51:2	0.50485	0.020687	0.176573	0.0509406	0.472381	0.0946068
ESI(+) MS	[M+NH4]+	860.769	4.65057	TAG	TAG 51:3	0.0570466	0.00838235	0.035911	0.00242223	0.0423326	0.00432408
ESI(+) MS	[M+NH4]+	880.833	5.89929	TAG	TAG 52:0	2.30631	0.0511368	2.94626	0.0141564	2.72334	0.116546
ESI(+) MS	[M+NH4]+	878.817	5.56357	TAG	TAG 52:1	2.21348	0.0588804	2.02998	0.0977522	2.46238	0.0846566
ESI(+) MS	[M+NH4]+	876.801	5.23414	TAG	TAG 52:2	1.48184	0.0291725	1.09934	0.0731153	1.54111	0.0656898
ESI(+) MS	[M+NH4]+	874.785	4.89229	TAG	TAG 52:3	0.201883	0.0121719	0.254795	0.0102913	0.203797	0.0324747
ESI(+) MS	[M+NH4]+	894.849	5.99671	TAG	TAG 53:0	1.42186	0.102593	2.12345	0.0611303	1.54478	0.0415079
ESI(+) MS	[M+NH4]+	892.833	5.68286	TAG	TAG 53:1	2.29948	0.0353488	1.41986	0.236843	2.21767	0.00720693
ESI(+) MS	[M+NH4]+	890.817	5.37229	TAG	TAG 53:2	0.793275	0.0411634	0.382817	0.0893461	0.584589	0.0382188
ESI(+) MS	[M+NH4]+	888.8	5.06786	TAG	TAG 53:3	0.0600317	0.00544093	0.0511968	0.000156393	0.0419088	0.00105626
ESI(+) MS	[M+NH4]+	908.865	6.28871	TAG	TAG 54:0	1.31974	0.0433835	2.31544	0.106019	1.69693	0.232111
ESI(+) MS	[M+NH4]+	906.849	5.97157	TAG	TAG 54:1	1.16815	0.0627365	1.14806	0.0240491	1.42798	0.13005
ESI(+) MS	[M+NH4]+	904.832	5.64829	TAG	TAG 54:2	0.444384	0.0236397	0.479255	0.042395	0.445954	0.0379374
ESI(+) MS	[M+NH4]+	902.816	5.31586	TAG	TAG 54:3	0.189902	0.00926616	0.16471	0.00223442	0.162237	0.00163638
ESI(+) MS	[M+NH4]+	922.88	6.37971	TAG	TAG 55:0	0.995319	0.0689752	1.57873	0.0936232	0.995494	0.0597109
ESI(+) MS	[M+NH4]+	920.864	6.08457	TAG	TAG 55:1	0.82643	0.0082206	0.705284	0.0441771	0.907791	0.105231
ESI(+) MS	[M+NH4]+	918.849	5.76129	TAG	TAG 55:2	0.416108	0.0123638	0.2035	0.0428939	0.291237	0.0058277
ESI(+) MS	[M+NH4]+	916.832	5.46329	TAG	TAG 55:3	0.0273386	0.00236658	0.0309923	0.00157572	0.0183892	0.000814138
ESI(+) MS	[M+NH4]+	936.896	6.66186	TAG	TAG 56:0	1.54113	0.24195	2.87763	0.0974747	1.94903	0.156869
ESI(+) MS	[M+NH4]+	934.881	6.37029	TAG	TAG 56:1	0.910468	0.0316121	1.07792	0.0491172	1.09545	0.103138
ESI(+) MS	[M+NH4]+	932.864	6.10029	TAG	TAG 56:2	0.270359	0.011876	0.317774	0.0284929	0.296306	0.0374017
ESI(+) MS	[M+NH4]+	930.847	5.799	TAG	TAG 56:3	0.0386565	0.00284209	0.0620383	0.0101754	0.0337738	0.00194433
ESI(+) MS	[M+NH4]+	950.911	6.77814	TAG	TAG 57:0	0.757649	0.0911049	1.28097	0.0798796	0.662354	0.000397147
ESI(+) MS	[M+NH4]+	948.896	6.596	TAG	TAG 57:1	0.694265	0.00779665	0.640992	0.018775	0.777532	0.037933
ESI(+) MS	[M+NH4]+	946.879	6.32	TAG	TAG 57:2	0.356672	0.0264331	0.173044	0.00177674	0.397409	0.0401666
ESI(+) MS	[M+NH4]+	944.864	6.06257	TAG	TAG 57:3	0.0481506	0.00422427	0.0321571	0.00391981	0.0428452	0.00585119
ESI(+) MS	[M+NH4]+	964.927	7.001	TAG	TAG 58:0	1.75246	0.279539	3.17974	0.184493	2.23666	0.0563841
ESI(+) MS	[M+NH4]+	962.912	6.74357	TAG	TAG 58:1	1.35664	0.0953899	1.61053	0.106654	1.52886	0.0126777
ESI(+) MS	[M+NH4]+	960.895	6.50186	TAG	TAG 58:2	0.518968	0.0195418	0.592681	0.0571426	0.562819	0.0629933
ESI(+) MS	[M+NH4]+	958.879	6.21643	TAG	TAG 58:3	0.072086	0.00660229	0.0880277	0.00947669	0.0669495	0.00895978
ESI(+) MS	[M+NH4]+	978.943	7.12314	TAG	TAG 59:0	0.824268	0.145905	1.4286	0.00777728	0.895584	0.020156
ESI(+) MS	[M+NH4]+	976.927	6.91314	TAG	TAG 59:1	0.808075	0.0176279	0.776911	0.0195195	0.861032	0.0107535
ESI(+) MS	[M+NH4]+	974.911	6.69643	TAG	TAG 59:2	0.764097	0.0682148	0.284274	0.00834047	0.745892	0.0233145
ESI(+) MS	[M+NH4]+	972.895	6.42971	TAG	TAG 59:3	0.155795	0.0166875	0.0871377	0.00834779	0.127694	0.0123394
ESI(+) MS	[M+NH4]+	992.958	7.31143	TAG	TAG 60:0	2.15028	0.272839	3.47232	0.226151	2.4902	0.199722
ESI(+) MS	[M+NH4]+	990.943	7.073	TAG	TAG 60:1	1.89399	0.0829049	2.01348	0.238639	1.97484	0.0711671
ESI(+) MS	[M+NH4]+	988.926	6.82529	TAG	TAG 60:2	0.848154	0.0114637	1.00783	0.122861	0.804422	0.0257576
ESI(+) MS	[M+NH4]+	986.91	6.56771	TAG	TAG 60:3	0.148318	0.0151395	0.191659	0.0280482	0.123962	0.00959508
ESI(+) MS	[M+NH4]+	1006.97	7.39943	TAG	TAG 61:0	1.13046	0.161882	1.78383	0.0246308	1.07708	0.0264011
ESI(+) MS	[M+NH4]+	1004.96	7.21086	TAG	TAG 61:1	0.900342	0.017424	0.84438	0.0185133	0.813825	0.0188228
ESI(+) MS	[M+NH4]+	1002.94	7.01671	TAG	TAG 61:2	0.48354	0.0493823	0.289108	0.0242778	0.402616	0.0267697
ESI(+) MS	[M+NH4]+	1000.93	6.76871	TAG	TAG 61:3	0.149472	0.018212	0.0932804	0.0109131	0.106052	0.00615788
ESI(+) MS	[M+NH4]+	1020.99	7.60629	TAG	TAG 62:0	1.89341	0.258379	3.12058	0.183351	2.01553	0.221982
ESI(+) MS	[M+NH4]+	1018.97	7.38371	TAG	TAG 62:1	0.965023	0.0322482	1.28635	0.159803	0.96514	0.0222326
ESI(+) MS	[M+NH4]+	1016.96	7.15457	TAG	TAG 62:2	0.513857	0.02978	0.567024	0.110351	0.45223	0.00570942
ESI(+) MS	[M+NH4]+	1014.94	6.91	TAG	TAG 62:3	0.0964386	0.00506586	0.147211	0.0283931	0.0790798	0.00254246
ESI(+) MS	[M+NH4]+	1035	7.70986	TAG	TAG 63:0	0.554383	0.0676465	1.10156	0.0231725	0.509489	0.0247224
ESI(+) MS	[M+NH4]+	1032.99	7.49986	TAG	TAG 63:1	0.559231	0.00854696	0.571183	0.00220457	0.464598	0.0181125
ESI(+) MS	[M+NH4]+	1030.97	7.24229	TAG	TAG 63:2	0.237679	0.0286958	0.16155	0.0166448	0.184752	0.0127546
ESI(+) MS	[M+NH4]+	1028.96	6.93514	TAG	TAG 63:3	0.0280967	0.0037836	0.0153705	0.000105614	0.0162084	0.00167118
ESI(+) MS	[M+NH4]+	1049.02	7.88571	TAG	TAG 64:0	1.14658	0.14127	2.393	0.261857	1.13782	0.276816
ESI(+) MS	[M+NH4]+	1047	7.67543	TAG	TAG 64:1	0.50128	0.0169018	0.945311	0.107947	0.47548	0.0105839
ESI(+) MS	[M+NH4]+	1044.99	7.459	TAG	TAG 64:2	0.201251	0.0118571	0.325851	0.0766528	0.17064	0.00728124
ESI(+) MS	[M+NH4]+	1042.97	7.22657	TAG	TAG 64:3	0.0453719	0.00676017	0.0663222	0.0188139	0.0344877	0.00501582
ESI(+) MS	[M+NH4]+	1063.04	7.99257	TAG	TAG 65:0	0.317011	0.0377445	0.704676	0.0482932	0.29012	0.0182306
ESI(+) MS	[M+NH4]+	1061.02	7.826	TAG	TAG 65:1	0.23164	0.0130837	0.365555	0.0128141	0.203537	3.20795e-05
ESI(+) MS	[M+NH4]+	1059	7.58129	TAG	TAG 65:2	0.117036	0.0125317	0.097099	0.00931124	0.0889058	0.00904371
ESI(+) MS	[M+NH4]+	1056.99	7.258	TAG	TAG 65:3	0.00784629	0.000835119	0.00669874	0.000756157	0.00534137	0.00093807
ESI(+) MS	[M+NH4]+	1077.05	8.14329	TAG	TAG 66:0	0.952689	0.151802	1.87458	0.173863	0.965134	0.124454
ESI(+) MS	[M+NH4]+	1075.04	7.94857	TAG	TAG 66:1	0.255665	0.0401681	0.542291	0.017753	0.218482	0.000576176
ESI(+) MS	[M+NH4]+	1073.02	7.76643	TAG	TAG 66:2	0.127608	0.00991358	0.185914	0.0343298	0.10348	0.00461652
ESI(+) MS	[M+NH4]+	1071.01	7.54071	TAG	TAG 66:3	0.019839	0.00588836	0.0387748	0.00945667	0.0172071	0.00439485
ESI(+) MS	[M+NH4]+	1091.07	8.26229	TAG	TAG 67:0	0.207385	0.068378	0.44976	0.008039	0.204584	0.0367947
ESI(+) MS	[M+NH4]+	1089.05	8.10229	TAG	TAG 67:1	0.191969	0.00948332	0.302656	0.0177153	0.16187	0.00513045
ESI(+) MS	[M+NH4]+	1087.04	7.91086	TAG	TAG 67:2	0.0885517	0.00771634	0.0929548	0.00575746	0.0757541	0.00517924
ESI(+) MS	[M+NH4]+	1085.02	7.73186	TAG	TAG 67:3	0.0221094	0.00163707	0.0211933	0.0012061	0.0167712	0.00385681
ESI(+) MS	[M+NH4]+	1105.08	8.39414	TAG	TAG 68:0	0.993682	0.222062	1.85658	0.0933074	0.896882	0.0846413
ESI(+) MS	[M+NH4]+	1103.07	8.21214	TAG	TAG 68:1	0.247403	0.0572863	0.506837	0.0256676	0.221808	0.00929213
ESI(+) MS	[M+NH4]+	1101.05	8.03029	TAG	TAG 68:2	0.0966922	0.00689784	0.158758	0.0158075	0.0842129	0.00382806
ESI(+) MS	[M+NH4]+	1099.04	7.83857	TAG	TAG 68:3	0.0230191	0.0026145	0.0332103	0.00449889	0.0187595	0.00373408
ESI(+) MS	[M+NH4]+	1119.1	8.49157	TAG	TAG 69:0	0.156243	0.0289999	0.388485	0.0377	0.150059	0.00270411
ESI(+) MS	[M+NH4]+	1117.08	8.33757	TAG	TAG 69:1	0.145873	0.00783687	0.270641	0.025362	0.126749	0.00402541
ESI(+) MS	[M+NH4]+	1115.07	8.18071	TAG	TAG 69:2	0.0844047	0.00639471	0.0890119	0.00643849	0.0723854	0.00746572
ESI(+) MS	[M+NH4]+	1113.05	7.99886	TAG	TAG 69:3	0.0301849	0.00176428	0.0276147	0.00147103	0.0250438	0.00241885
ESI(+) MS	[M+NH4]+	1133.11	8.62343	TAG	TAG 70:0	0.517495	0.0958124	1.40876	0.170742	0.519995	0.0583323
ESI(+) MS	[M+NH4]+	1131.1	8.44443	TAG	TAG 70:1	0.182372	0.0306165	0.411792	0.0478811	0.146356	0.00185233
ESI(+) MS	[M+NH4]+	1129.08	8.27786	TAG	TAG 70:2	0.0853669	0.00261537	0.161152	0.0307366	0.0696772	0.00332568
ESI(+) MS	[M+NH4]+	1127.07	8.10543	TAG	TAG 70:3	0.0276224	0.000496239	0.0355697	0.00681164	0.0217202	0.00191299
ESI(+) MS	[M+NH4]+	1147.13	8.683	TAG	TAG 71:0	0.0978051	0.0220919	0.299218	0.0117843	0.0920931	0.00191342
ESI(+) MS	[M+NH4]+	1145.11	8.58586	TAG	TAG 71:1	0.0913856	0.00549979	0.205424	0.0226426	0.0869951	0.00206816
ESI(+) MS	[M+NH4]+	1143.1	8.46643	TAG	TAG 71:2	0.0780485	0.00524842	0.0865485	0.0102564	0.0781692	0.00402466
ESI(+) MS	[M+NH4]+	1141.08	8.27157	TAG	TAG 71:3	0.0438064	0.00519049	0.0290798	0.00285424	0.0412537	0.00109189
ESI(+) MS	[M+NH4]+	1161.15	8.87757	TAG	TAG 72:0	0.194026	0.15849	0.91902	0.0461157	0.226012	0.0104951
ESI(+) MS	[M+NH4]+	1159.13	8.66414	TAG	TAG 72:1	0.0935146	0.010605	0.279452	0.0291978	0.0835321	0.00405777
ESI(+) MS	[M+NH4]+	1157.11	8.53871	TAG	TAG 72:2	0.0764	0.00357182	0.113932	0.0233428	0.0699524	0.00505421
ESI(+) MS	[M+NH4]+	1155.1	8.369	TAG	TAG 72:3	0.0357937	0.00303902	0.0288941	0.00513469	0.0292247	0.00298763
ESI(+) MS	[M+NH4]+	1175.16	8.93386	MMDAG	MMDAG 73:0	0.0473203	0.00418641	0.163641	0.0162186	0.0418828	0.00366623
ESI(+) MS	[M+NH4]+	1173.14	8.72086	MMDAG	MMDAG 73:1	0.0742882	0.00396459	0.159189	0.01242	0.0772292	0.00243828
ESI(+) MS	[M+NH4]+	1171.13	8.69871	MMDAG	MMDAG 73:2	0.0952491	0.0051562	0.102748	0.00451325	0.113746	0.0198594
ESI(+) MS	[M+NH4]+	1169.11	8.50729	MMDAG	MMDAG 73:3	0.0872335	0.00610734	0.0363932	0.00483143	0.0853226	0.00206419
ESI(+) MS	[M+NH4]+	1189.18	9.07514	MMDAG	MMDAG 74:0	0.114041	0.0286031	0.535312	0.0224836	0.126865	0.0228548
ESI(+) MS	[M+NH4]+	1187.16	8.85871	MMDAG	MMDAG 74:1	0.0786071	0.0090734	0.184554	0.0307215	0.0676929	0.00160708
ESI(+) MS	[M+NH4]+	1185.14	8.78986	MMDAG	MMDAG 74:2	0.0982494	0.00933866	0.111042	0.0139093	0.102187	0.00559448
ESI(+) MS	[M+NH4]+	1183.13	8.62971	MMDAG	MMDAG 74:3	0.0671175	0.00356603	0.0317803	0.00294495	0.0623025	0.00288934
ESI(+) MS	[M+NH4]+	1203.19	9.13486	MMDAG	MMDAG 75:0	0.0168557	0.00637913	0.0679055	0.0118763	0.0195553	0.00140877
ESI(+) MS	[M+NH4]+	1201.18	9.01229	MMDAG	MMDAG 75:1	0.0390179	0.00769101	0.104069	0.00528465	0.0495036	0.00983348
ESI(+) MS	[M+NH4]+	1199.16	8.95257	MMDAG	MMDAG 75:2	0.135084	0.00623156	0.137545	0.00700342	0.146055	0.00831356
ESI(+) MS	[M+NH4]+	1197.15	8.727	MMDAG	MMDAG 75:3	0.180073	0.00886471	0.0789409	0.00464491	0.18139	0.00594936
ESI(+) MS	[M+NH4]+	1217.21	9.27286	MMDAG	MMDAG 76:0	0.0656453	0.0201279	0.252502	0.0591952	0.0671038	0.00129359
ESI(+) MS	[M+NH4]+	1215.19	9.01543	MMDAG	MMDAG 76:1	0.0612602	0.0131606	0.142977	0.0195937	0.0673909	0.00204076
ESI(+) MS	[M+NH4]+	1213.18	9.03743	MMDAG	MMDAG 76:2	0.13228	0.00466932	0.126963	0.00323935	0.112737	0.00555156
ESI(+) MS	[M+NH4]+	1211.16	8.84286	MMDAG	MMDAG 76:3	0.131811	0.00579878	0.0582034	0.00155321	0.119463	0.00505505
ESI(+) MS	[M+NH4]+	1231.23	9.33571	MMDAG	MMDAG 77:0	0.00292529	0.00193843	0.0389143	0.0186095	0.00628099	0.00341399
ESI(+) MS	[M+NH4]+	1229.21	9.17886	MMDAG	MMDAG 77:1	0.0194485	0.00749866	0.0576343	0.00829102	0.0221201	0.00459857
ESI(+) MS	[M+NH4]+	1227.19	9.10971	MMDAG	MMDAG 77:2	0.0902778	0.00505983	0.129254	0.007174	0.117204	0.00560133
ESI(+) MS	[M+NH4]+	1225.18	8.95257	MMDAG	MMDAG 77:3	0.19115	0.00868197	0.114489	0.00353017	0.207135	0.00355264
ESI(+) MS	[M+NH4]+	1241.21	9.17257	MMDAG	MMDAG 78:2	0.103823	0.00753105	0.122167	0.00450595	0.121607	0.0115208
ESI(+) MS	[M+NH4]+	1239.19	9.028	MMDAG	MMDAG 78:3	0.126636	0.00705532	0.0619026	0.00351637	0.109012	0.0096973
ESI(+) MS	[M+NH4]+	1257.24	9.41743	MMDAG	MMDAG 79:1	0.00546949	0.0019321	0.0196487	0.00551415	0.00598068	0.000240105
ESI(+) MS	[M+NH4]+	1255.23	9.29186	MMDAG	MMDAG 79:2	0.053343	0.0159006	0.0854088	0.00338864	0.072166	0.00163473
ESI(+) MS	[M+NH4]+	1253.21	9.182	MMDAG	MMDAG 79:3	0.116189	0.00795901	0.0784048	0.00779613	0.134031	0.0110311
ESI(+) MS	[M+NH4]+	1273.27	9.68071	MMDAG	MMDAG 80:0	0.00212593	0.00229362	0.0251482	0.0128186	0.000516821	0.000237386
ESI(+) MS	[M+NH4]+	1271.25	9.41743	MMDAG	MMDAG 80:1	0.00311268	0.00154711	0.0214219	0.0066875	0.00277083	0.00131144
ESI(+) MS	[M+NH4]+	1269.24	9.38914	MMDAG	MMDAG 80:2	0.0599408	0.015464	0.0504102	0.00246319	0.0468284	0.00402187
ESI(+) MS	[M+NH4]+	1267.22	9.21957	MMDAG	MMDAG 80:3	0.0618808	0.00647423	0.0333733	0.000180922	0.0541952	0.0081307
ESI(+) MS	[M+NH4]+	1285.27	9.5525	MMDAG	MMDAG 81:1	0.00113059	0.00102068	0.0148149	0.00578131	0.00292808	6.80686e-05
ESI(+) MS	[M+NH4]+	1283.26	9.47343	MMDAG	MMDAG 81:2	0.0206755	0.00550924	0.0394196	0.00787279	0.0296953	0.00493042
ESI(+) MS	[M+NH4]+	1281.24	9.32643	MMDAG	MMDAG 81:3	0.0491227	0.00660651	0.0392719	0.00155497	0.0600382	0.00408788
ESI(+) MS	[M+NH4]+	1299.29	9.55617	MMDAG	MMDAG 82:1	0.000987642	0.000424984	0.0157306	0.00590483	0.00277934	0.00128722
ESI(+) MS	[M+NH4]+	1297.27	9.51414	MMDAG	MMDAG 82:2	0.0205592	0.00547347	0.0303347	0.00570125	0.0244027	0.00594038
ESI(+) MS	[M+NH4]+	1295.26	9.45186	MMDAG	MMDAG 82:3	0.0222428	0.00189314	0.0146058	0.00188414	0.0210395	0.00480884
ESI(+) MS	[M+NH4]+	1313.3	9.66233	MMDAG	MMDAG 83:1	0.00269379	0.000740221	0.0226899	0.007425	0.00652981	0.000994011
ESI(+) MS	[M+NH4]+	1311.29	9.655	MMDAG	MMDAG 83:2	0.0149673	0.005556	0.0366945	0.00703412	0.0183563	0.00384974
ESI(+) MS	[M+NH4]+	1309.27	9.53929	MMDAG	MMDAG 83:3	0.0177482	0.00291613	0.0211993	0.00257634	0.0221115	0.000683658
ESI(+) MS	[M+NH4]+	1325.3	9.72157	MMDAG	MMDAG 84:2	0.00890907	0.0033544	0.0191378	0.00226201	0.00957873	0.00267495
ESI(+) MS	[M+NH4]+	1323.29	9.6185	MMDAG	MMDAG 84:3	0.00894155	0.00340835	0.0138607	0.00208864	0.0118616	0.00275276
ESI(+) MS	[M+NH4]+	1341.34	9.86383	MMDAG	MMDAG 85:1	0.000198129	0.000178819	0.0109417	0.00376313	0.00131049	0.00120532
ESI(+) MS	[M+NH4]+	1339.32	9.7685	MMDAG	MMDAG 85:2	0.00759579	0.00149829	0.0274706	0.00662232	0.00956136	0.00285596
ESI(+) MS	[M+NH4]+	1337.3	9.66967	MMDAG	MMDAG 85:3	0.00609941	0.0052936	0.0158915	0.000278318	0.0116233	0.00425034
ESI(+) MS	[M+NH4]+	1353.33	9.94443	MMDAG	MMDAG 86:2	0.00540617	0.00211092	0.0138661	0.00193221	0.00755798	0.00291834
ESI(+) MS	[M+NH4]+	1367.35	9.89114	MMDAG	MMDAG 87:2	0.00419515	0.00138531	0.0172406	0.00498412	0.00615039	0.000368258
ESI(+) MS	[M+NH4]+	1381.37	9.981	MMDAG	MMDAG 88:2	0.000687423	0.00031297	0.00702169	0.00264187	0.00202051	0.00111292
ESI(+) MS	[M+NH4]+	1395.38	10.0697	MMDAG	MMDAG 89:2	0.000361799	0.000182833	0.00961927	0.00331679	0.00243159	0.000285638
ESI(+) MS	[M+NH4]+	1409.4	10.0468	MMDAG	MMDAG 90:2	0.00114981	0.00105293	0.00482607	0.00109705	0.00134757	0.000608284
ESI(+) MS	[M+NH4]+	1423.41	10.2592	MMDAG	MMDAG 91:2	0.000263594	8.559e-05	0.00785606	0.0026498	0.000673651	0.000386321
ESI(+) MS	[M+NH4]+	1437.43	10.2042	MMDAG	MMDAG 92:2	0.000866255	0.000446958	0.00414828	0.000737083	0.00104205	6.34863e-05
ESI(+) MS	[M+NH4]+	1451.44	10.3505	MMDAG	MMDAG 93:2	0.000786821	1.81816e-05	0.0130288	0.00203232	0.000742087	0.000734193
ESI(+) MS	[M+NH4]+	1465.46	10.4605	MMDAG	MMDAG 94:2	0.000163159	6.07221e-05	0.00664521	0.000547942	0.000281808	0.000263814
ESI(+) MS	[M+NH4]+	1479.48	10.6441	MMDAG	MMDAG 95:2	0.000361759	5.92804e-06	0.013989	0.00101946	0.000799735	0.000487617
ESI(+) MS	[M+NH4]+	1493.49	10.6221	MMDAG	MMDAG 96:2	0.000395949	1.24174e-05	0.0078057	0.00119782	0.000735086	0.000531226
ESI(+) MS	[M+NH4]+	1507.51	10.6618	MMDAG	MMDAG 97:2	0.000527565	0.000379622	0.0110849	0.00196088	0.000496172	0.000159625
ESI(+) MS	[M+NH4]+	1521.52	10.5703	MMDAG	MMDAG 98:2	0.00113262	0.000408968	0.00676393	0.00165722	0.000484438	0.000470697
ESI(+) MS	[M+NH4]+	1535.54	10.8954	MMDAG	MMDAG 99:2	0	0	0.00652001	0.00157242	0.000188348	0.000102923
ESI(+) MS	[M+NH4]+	1273.28	9.626	GroMM keto	GroMM keto C-80	0.00375986	0.00331741	0.0262132	0.0113124	0.00320544	0.000144279
ESI(+) MS	[M+NH4]+	1317.33	8.07475	GroMM meth	GroMM meth C-83	0.0266028	0.0135963	0.00301922	0.00152116	0.014961	0.00564325
ESI(+) MS	[M+NH4]+	1331.35	8.15712	GroMM meth	GroMM meth C-84	0.0414424	0.0207249	0.00301207	0.000138641	0.0231218	0.00801069
ESI(+) MS	[M+NH4]+	1345.36	8.26125	GroMM meth	GroMM meth C-85	0.035762	0.0179496	0.00338797	0.000177781	0.0186088	0.00729683
ESI(+) MS	[M+NH4]+	1359.38	8.34362	GroMM meth	GroMM meth C-86	0.0503483	0.0255419	0.00388343	0.000831787	0.0263987	0.00828299
ESI(+) MS	[M+NH4]+	1373.39	8.43163	GroMM meth	GroMM meth C-87	0.0270939	0.014434	0.00208398	0.00144706	0.013868	0.00482761
ESI(+) MS	[M+NH4]+	1387.41	8.52238	GroMM meth	GroMM meth C-88	0.0219006	0.0100153	0.00360093	0.000681052	0.0115273	0.00428602
ESI(+) MS	[M+NH4]+	1401.42	8.61025	GroMM meth	GroMM meth C-89	0.027735	0.0129984	0.0040705	0.000657579	0.0132336	0.00377538
ESI(+) MS	[M+NH4]+	1415.44	8.69538	GroMM meth	GroMM meth C-90	0.0204576	0.00952024	0.00312851	0.000840412	0.00992108	0.00234359
ESI(+) MS	[M+NH4]+	1429.46	8.80513	GroMM meth	GroMM meth C-91	0.0277117	0.0100597	0.00643341	0.00120854	0.0137966	0.00374695
ESI(+) MS	[M+NH4]+	1451.28	7.914	TMM alpha	TMM alpha C-76	0.000656747	0.000644879	0.000302923	0.000132944	0.00123965	2.06007e-05
ESI(+) MS	[M+NH4]+	1479.31	8.14014	TMM alpha	TMM alpha C-78	0.00311756	0.000495625	0.000798936	0.000167079	0.00575165	0.000617748
ESI(+) MS	[M+NH4]+	1507.35	8.33129	TMM alpha	TMM alpha C-80	0.00301881	0.000709701	0.000703836	4.44127e-05	0.00771453	0.000983307
ESI(+) MS	[M+NH4]+	1535.38	8.545	TMM alpha	TMM alpha C-82	0.00237164	0.00101736	0.0006975	2.22721e-05	0.00774121	0.00128777
ESI(+) MS	[M+NH4]+	1549.39	8.67686	TMM alpha	TMM alpha C-83	0.000143926	2.46605e-05	0.00019603	2.99455e-05	0.00180987	0.000151883
ESI(+) MS	[M+NH4]+	1563.41	8.727	TMM alpha	TMM alpha C-84	0.00213181	0.000524687	0.000598451	0.000453404	0.0107508	0.00286024
ESI(+) MS	[M+NH4]+	1577.42	8.88386	TMM alpha	TMM alpha C-85	0.000139656	4.12938e-05	0.000227039	9.7507e-05	0.00140637	0.000332562
ESI(+) MS	[M+NH4]+	1591.44	8.90229	TMM alpha	TMM alpha C-86	0.000727554	0.000317354	0.000201783	8.60382e-05	0.00458434	0.00087881
ESI(+) MS	[M+NH4]+	1619.47	9.10657	TMM alpha	TMM alpha C-88	0.000159661	5.89334e-05	0.000100315	6.5909e-05	0.00118093	0.000184223
ESI(+) MS	[M+NH4]+	1579.4	7.74443	TMM keto	TMM keto C-84	0.000289247	0.000268263	4.09829e-05	9.04581e-06	0.0015525	0.000866193
ESI(+) MS	[M+NH4]+	1593.42	7.757	TMM keto	TMM keto C-85	0.000596078	0.000173479	6.87196e-05	6.99564e-07	0.0026016	0.000188676
ESI(+) MS	[M+NH4]+	1607.43	7.97371	TMM keto	TMM keto C-86	0.00087488	0.000260528	5.46474e-05	5.37036e-06	0.00449034	0.00183249
ESI(+) MS	[M+NH4]+	1621.45	7.97371	TMM keto	TMM keto C-87	0.00171813	0.00013897	0.000158693	0.000123468	0.00708832	0.00143814
ESI(+) MS	[M+NH4]+	1635.46	8.173	TMM keto	TMM keto C-88	0.000202282	0.000107795	0	0	0.00387991	0.0011852
ESI(+) MS	[M+NH4]+	1649.48	8.14317	TMM keto	TMM keto C-89	0.00056627	0.00019079	2.24763e-05	3.17862e-05	0.00392483	0.000333549
ESI(+) MS	[M+NH4]+	1663.49	8.3308	TMM keto	TMM keto C-90	7.23735e-05	4.01305e-05	0	0	0.00134571	5.95131e-05
ESI(+) MS	[M+NH4]+	1567.4	8.181	TMM meth	TMM meth C-83	0.000516968	0.000240988	0.000186607	0.000144556	0.00211331	8.46628e-05
ESI(+) MS	[M+NH4]+	1595.43	8.33443	TMM meth	TMM meth C-85	0.00158947	0.000717229	0.000266655	0.00017606	0.00651519	0.000461673
ESI(+) MS	[M+NH4]+	1609.45	8.3515	TMM meth	TMM meth C-86	0.000530272	0.000203289	2.15783e-05	3.05163e-05	0.00200323	0.000751867
ESI(+) MS	[M+NH4]+	1623.46	8.53243	TMM meth	TMM meth C-87	0.0018656	0.000291049	0.000320188	4.66979e-06	0.00896609	0.000102589
ESI(+) MS	[M+NH4]+	1637.48	8.51671	TMM meth	TMM meth C-88	0.00156035	0.000313337	9.35133e-05	2.69862e-05	0.00484609	0.000154047
ESI(+) MS	[M+NH4]+	1651.49	8.73014	TMM meth	TMM meth C-89	0.00110664	0.000310013	8.82603e-05	5.73808e-05	0.00682458	0.000585696
ESI(+) MS	[M+NH4]+	1665.51	8.69233	TMM meth	TMM meth C-90	0.000667683	0.000179497	4.54839e-05	6.4324e-05	0.00237698	0.000467502
ESI(+) MS	[M+NH4]+	1679.52	8.89317	TMM meth	TMM meth C-91	0.000599558	0.000154856	4.41975e-05	6.25047e-05	0.00429309	0.000603094
ESI(+) MS	[M+NH4]+	1315.35	9.64614	PDIM A	PDIM A C-87	0.250477	0.0281357	0.215117	0.0159327	0.212171	0.0659261
ESI(+) MS	[M+NH4]+	1343.39	9.81257	PDIM A	PDIM A C-89	0.816272	0.0830312	0.884123	0.076898	0.645198	0.190732
ESI(+) MS	[M+NH4]+	1357.4	9.844	PDIM A	PDIM A C-90	0.734989	0.0448353	0.687667	0.0742527	0.649331	0.200688
ESI(+) MS	[M+NH4]+	1371.42	9.93514	PDIM A	PDIM A C-91	0.94167	0.108796	1.12118	0.133729	0.787653	0.210587
ESI(+) MS	[M+NH4]+	1385.43	10.0041	PDIM A	PDIM A C-92	1.66079	0.125411	1.56836	0.21218	1.34063	0.438243
ESI(+) MS	[M+NH4]+	1399.45	10.0604	PDIM A	PDIM A C-93	0.783349	0.0716636	0.756505	0.102491	0.755719	0.20528
ESI(+) MS	[M+NH4]+	1413.46	10.145	PDIM A	PDIM A C-94	1.51108	0.209314	1.66913	0.179215	1.30517	0.325029
ESI(+) MS	[M+NH4]+	1427.48	10.1921	PDIM A	PDIM A C-95	1.0295	0.106212	0.749769	0.0661092	1.02771	0.270725
ESI(+) MS	[M+NH4]+	1455.51	10.3051	PDIM A	PDIM A C-97	1.1419	0.143079	1.0573	0.00972588	1.04814	0.23901
ESI(+) MS	[M+NH4]+	1469.53	10.3616	PDIM A	PDIM A C-98	1.25717	0.0973176	0.454986	0.031993	1.25209	0.318405
ESI(+) MS	[M+NH4]+	1483.54	10.415	PDIM A	PDIM A C-99	0.421281	0.0434368	0.192136	0.0224716	0.403808	0.0993092
ESI(+) MS	[M+NH4]+	1497.56	10.4967	PDIM A	PDIM A C-100	1.84899	0.183543	0.595845	0.181418	1.58794	0.281484
ESI(+) MS	[M+NH4]+	1511.57	10.525	PDIM A	PDIM A C-101	0.264941	0.0281879	0.0506459	0.0209868	0.218746	0.0553846
ESI(+) MS	[M+NH4]+	1525.59	10.588	PDIM A	PDIM A C-102	0.137925	0.0160364	0.0200427	0.0114256	0.101294	0.0173348
ESI(+) MS	[M+NH4]+	1539.6	10.6224	PDIM A	PDIM A C-103	0.409435	0.0711914	0.0328232	0.0189216	0.247789	0.0198351
ESI(+) MS	[M+NH4]+	1553.62	10.6443	PDIM A	PDIM A C-104	0.0542171	0.00903436	0.00387419	0.000425104	0.0234293	0.00297222
ESI(+) MS	[M+NH4]+	1567.63	10.7207	PDIM A	PDIM A C-105	0.0196485	0.00707704	9.37881e-05	5.64843e-05	0.00713706	0.00127532
ESI(+) MS	[M+NH4]+	1581.64	10.7353	PDIM A	PDIM A C-106	0.0360804	0.0103338	0.00113229	0.000653147	0.0154309	0.00173263
ESI(+) MS	[M+NH4]+	1313.34	9.31057	PDIM B	PDIM B C-87	0.433289	0.103956	0.318156	0.0769847	0.32473	0.0225627
ESI(+) MS	[M+NH4]+	1327.35	9.36086	PDIM B	PDIM B C-88	0.990317	0.213744	0.849832	0.168434	0.741398	0.0675719
ESI(+) MS	[M+NH4]+	1341.37	9.42371	PDIM B	PDIM B C-89	0.813608	0.134116	0.607835	0.103533	0.725745	0.0752766
ESI(+) MS	[M+NH4]+	1355.39	9.54886	PDIM B	PDIM B C-90	0.917016	0.141437	0.819411	0.11296	0.735205	0.0888491
ESI(+) MS	[M+NH4]+	1369.4	9.54871	PDIM B	PDIM B C-91	1.68063	0.146712	1.36192	0.141818	1.39568	0.226092
ESI(+) MS	[M+NH4]+	1383.42	9.64314	PDIM B	PDIM B C-92	0.763625	0.0815279	0.524779	0.0256287	0.701432	0.119665
ESI(+) MS	[M+NH4]+	1397.43	9.76229	PDIM B	PDIM B C-93	1.09695	0.0503723	0.93909	0.049729	0.900664	0.169379
ESI(+) MS	[M+NH4]+	1411.45	9.79371	PDIM B	PDIM B C-94	1.0469	0.0659079	0.538384	0.031117	0.947695	0.194985
ESI(+) MS	[M+NH4]+	1425.46	9.84071	PDIM B	PDIM B C-95	0.312694	0.0193848	0.170342	0.00123315	0.332945	0.093032
ESI(+) MS	[M+NH4]+	1439.48	9.94129	PDIM B	PDIM B C-96	0.618698	0.0619523	0.315604	0.00773036	0.563141	0.108779
ESI(+) MS	[M+NH4]+	1453.49	9.92571	PDIM B	PDIM B C-97	0.365573	0.0647446	0.0901692	0.00153643	0.448188	0.0992365
ESI(+) MS	[M+NH4]+	1467.51	9.99486	PDIM B	PDIM B C-98	0.0919983	0.00485154	0.0540133	0.0092566	0.11128	0.037538
ESI(+) MS	[M+NH4]+	1481.53	10.0854	PDIM B	PDIM B C-99	0.218583	0.0262224	0.0550098	0.00206829	0.293349	0.0822476
ESI(+) MS	[M+NH4]+	1495.54	10.1167	PDIM B	PDIM B C-100	0.0804325	0.0106361	0.0469669	0.00966161	0.0801424	0.0260254
ESI(+) MS	[M+NH4]+	1509.56	10.189	PDIM B	PDIM B C-101	0.0404614	0.00446323	0.0209179	0.00358425	0.0397951	0.0124148
ESI(+) MS	[M+NH4]+	1523.57	10.2487	PDIM B	PDIM B C-102	0.0444401	0.0027087	0.0176704	0.000962038	0.0415939	0.0134562
ESI(+) MS	[M+NH4]+	1537.59	10.3177	PDIM B	PDIM B C-103	0.0338937	0.00136963	0.0316232	0.00257708	0.0310687	0.0102178
ESI(+) MS	[M+NH4]+	1551.6	10.3647	PDIM B	PDIM B C-104	0.0319017	0.00195375	0.012805	0.000280964	0.0333156	0.0123693
ESI(+) MS	[M+NH4]+	1565.62	10.4244	PDIM B	PDIM B C-105	0.0172404	0.00141579	0.00767472	0.000432633	0.017126	0.0041079
ESI(+) MS	[M+NH4]+	1579.64	10.4999	PDIM B	PDIM B C-106	0.0472194	0.00116739	0.0177441	0.00459284	0.0408736	0.0120317
ESI(+) MS	[M+NH4]+	1593.65	10.5156	PDIM B	PDIM B C-107	0.0075586	0.00046472	0.00025919	0.000301296	0.00579091	0.0016513
ESI(+) MS	[M+NH4]+	1607.66	10.6319	PDIM B	PDIM B C-108	0.00549773	0.000345638	0.000636045	0.000417095	0.00378396	0.00118414
ESI(+) MS	[M+NH4]+	1621.68	10.6194	PDIM B	PDIM B C-109	0.012024	0.000577255	0.000583385	0.000391915	0.0077458	0.00130962
